# Supplementary material for: Uncatalyzed diastereoselective synthesis of alkyliminofurochromone-derived benzylmalononitriles via a three-component cascade reaction: competition between Diels–Alder cycloaddition and Michael addition
Source: Royal Society of Chemistry journal article supplement (doi:10.1039/d0ob02540b), 2021-01-01
Supplement: d0ob02540b1.pdf [file d0ob02540b1.pdf]

## Supporting Information

### **Uncatalyzed diastereoselective synthesis of alkyliminofurochromone-derived benzylmalononitriles *via* a three-component cascade reaction: Competition between Diels-Alder cycloaddition and Michael addition**

**Mohammad Bagher Teimouri,<sup>\*a</sup> Zahra Mokhtare,<sup>a</sup> Hamid Reza Khavasi<sup>b</sup>**

<sup>a</sup> *Faculty of Chemistry, Kharazmi University, Mofateh Ave., Tehran, Iran*

<sup>b</sup> *Department of Inorganic Chemistry and Catalysis, Shahid Beheshti University, Evin, Tehran, Iran*

## Table of Contents:

| <b>List of contents</b>          | <b>Page</b> | <b>List of contents</b>                           | <b>Page</b> |
|----------------------------------|-------------|---------------------------------------------------|-------------|
| FT-IR of <b>4a</b>               | <b>S3</b>   | <sup>1</sup> H NMR of <b>4j</b>                   | <b>S19</b>  |
| <sup>1</sup> H NMR of <b>4a</b>  | <b>S3</b>   | <sup>13</sup> C NMR of <b>4j</b>                  | <b>S19</b>  |
| <sup>13</sup> C NMR of <b>4a</b> | <b>S4</b>   | HRMS of <b>4j</b>                                 | <b>S20</b>  |
| HRMS of <b>4a</b>                | <b>S4</b>   | FT-IR of <b>4k</b>                                | <b>S20</b>  |
| FT-IR of <b>4b</b>               | <b>S5</b>   | <sup>1</sup> H NMR of <b>4k</b>                   | <b>S21</b>  |
| <sup>1</sup> H NMR of <b>4b</b>  | <b>S5</b>   | <sup>13</sup> C NMR of <b>4k</b>                  | <b>S21</b>  |
| <sup>13</sup> C NMR of <b>4b</b> | <b>S6</b>   | HRMS of <b>4k</b>                                 | <b>S22</b>  |
| FT-IR of <b>4c</b>               | <b>S6</b>   | FT-IR of <b>4l</b>                                | <b>S22</b>  |
| <sup>1</sup> H NMR of <b>4c</b>  | <b>S7</b>   | <sup>1</sup> H NMR of <b>4l</b>                   | <b>S23</b>  |
| <sup>13</sup> C NMR of <b>4c</b> | <b>S7</b>   | <sup>13</sup> C NMR of <b>4l</b>                  | <b>S23</b>  |
| FT-IR of <b>4d</b>               | <b>S8</b>   | FT-IR of <b>4m</b>                                | <b>S24</b>  |
| <sup>1</sup> H NMR of <b>4d</b>  | <b>S8</b>   | <sup>1</sup> H NMR of <b>4m</b>                   | <b>S24</b>  |
| <sup>13</sup> C NMR of <b>4d</b> | <b>S9</b>   | <sup>13</sup> C NMR of <b>4m</b>                  | <b>S25</b>  |
| FT-IR of <b>4e</b>               | <b>S9</b>   | FT-IR of <b>4n</b>                                | <b>S25</b>  |
| <sup>1</sup> H NMR of <b>4e</b>  | <b>S10</b>  | <sup>1</sup> H NMR of <b>4n</b>                   | <b>S26</b>  |
| <sup>13</sup> C NMR of <b>4e</b> | <b>S10</b>  | <sup>13</sup> C NMR of <b>4n</b>                  | <b>S26</b>  |
| HRMS of <b>4e</b>                | <b>S11</b>  | HRMS of <b>4n</b>                                 | <b>S27</b>  |
| FT-IR of <b>4f</b>               | <b>S11</b>  | FT-IR of <b>4o</b>                                | <b>S27</b>  |
| <sup>1</sup> H NMR of <b>4f</b>  | <b>S12</b>  | <sup>1</sup> H NMR of <b>4o</b>                   | <b>S28</b>  |
| <sup>13</sup> C NMR of <b>4f</b> | <b>S12</b>  | <sup>13</sup> C NMR of <b>4o</b>                  | <b>S28</b>  |
| HRMS of <b>4f</b>                | <b>S13</b>  | HRMS of <b>4o</b>                                 | <b>S29</b>  |
| FT-IR of <b>4g</b>               | <b>S13</b>  | FT-IR of <b>4p</b>                                | <b>S29</b>  |
| <sup>1</sup> H NMR of <b>4g</b>  | <b>S14</b>  | <sup>1</sup> H NMR of <b>4p</b>                   | <b>S30</b>  |
| <sup>13</sup> C NMR of <b>4g</b> | <b>S14</b>  | <sup>13</sup> C NMR of <b>4p</b>                  | <b>S30</b>  |
| HRMS of <b>4g</b>                | <b>S15</b>  | FT-IR of <b>4q</b>                                | <b>S31</b>  |
| FT-IR of <b>4h</b>               | <b>S15</b>  | <sup>1</sup> H NMR of <b>4q</b>                   | <b>S31</b>  |
| <sup>1</sup> H NMR of <b>4h</b>  | <b>S16</b>  | <sup>13</sup> C NMR of <b>4q</b>                  | <b>S32</b>  |
| <sup>13</sup> C NMR of <b>4h</b> | <b>S16</b>  | FT-IR of <b>4r</b>                                | <b>S32</b>  |
| FT-IR of <b>4i</b>               | <b>S17</b>  | <sup>1</sup> H NMR of <b>4r</b>                   | <b>S33</b>  |
| <sup>1</sup> H NMR of <b>4i</b>  | <b>S17</b>  | <sup>13</sup> C NMR of <b>4r</b>                  | <b>S33</b>  |
| <sup>13</sup> C NMR of <b>4i</b> | <b>S18</b>  | Single crystal structure of <b>4p</b>             | <b>S34</b>  |
| FT-IR of <b>4j</b>               | <b>S18</b>  | Description of the crystal structure of <b>4p</b> | <b>S36</b>  |

**FT-IR of 4a:**

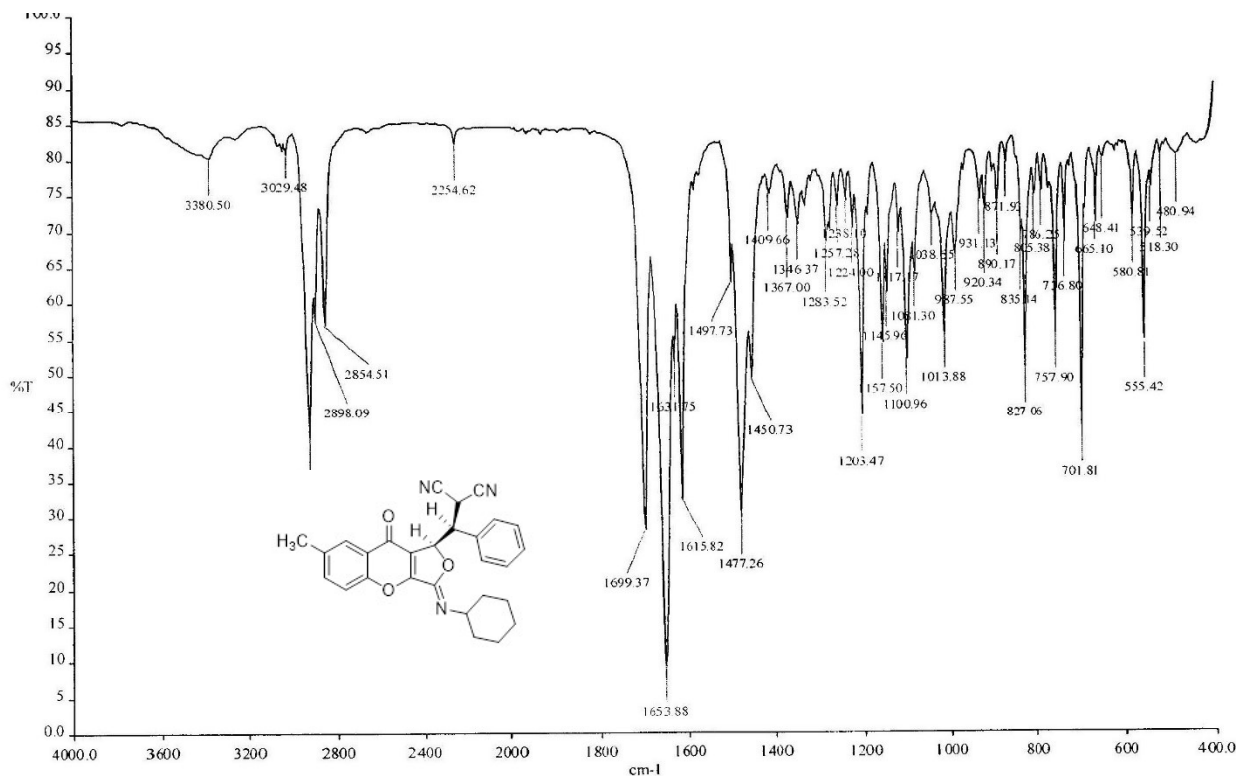

Ms. Mokhtare

Sample: ZM-61

**<sup>1</sup>H NMR (300 MHz, CDCl<sub>3</sub>) of 4a:**

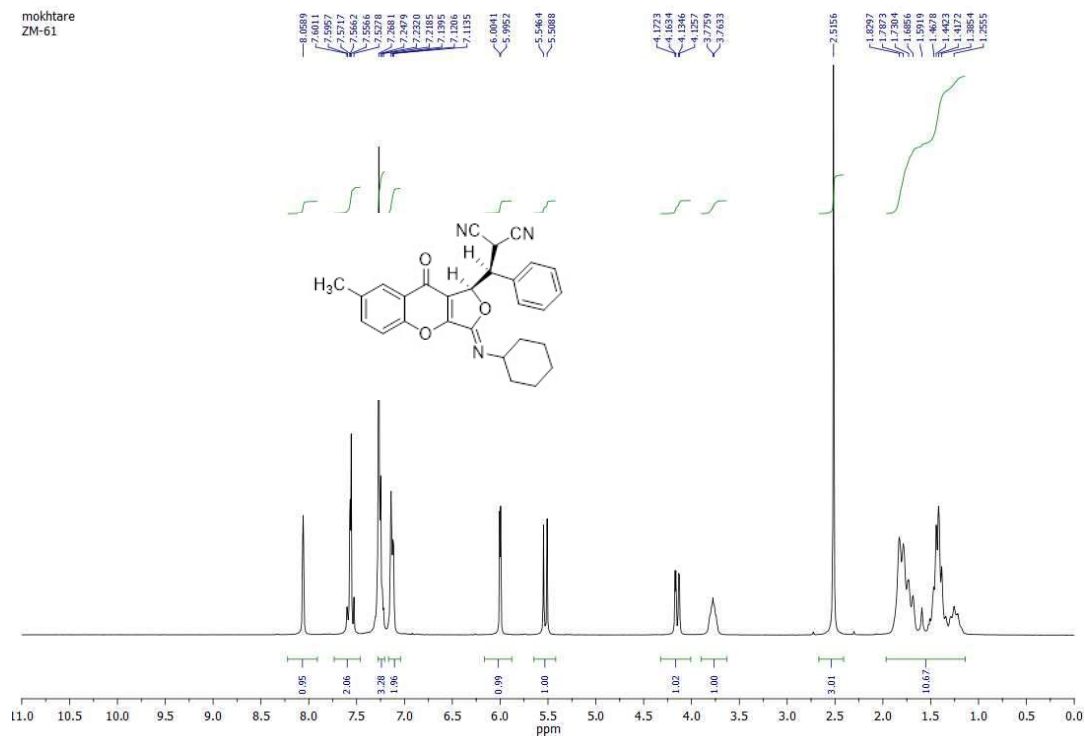

### $^{13}\text{C}$ NMR (75 MHz, $\text{CDCl}_3$ ) of 4a:

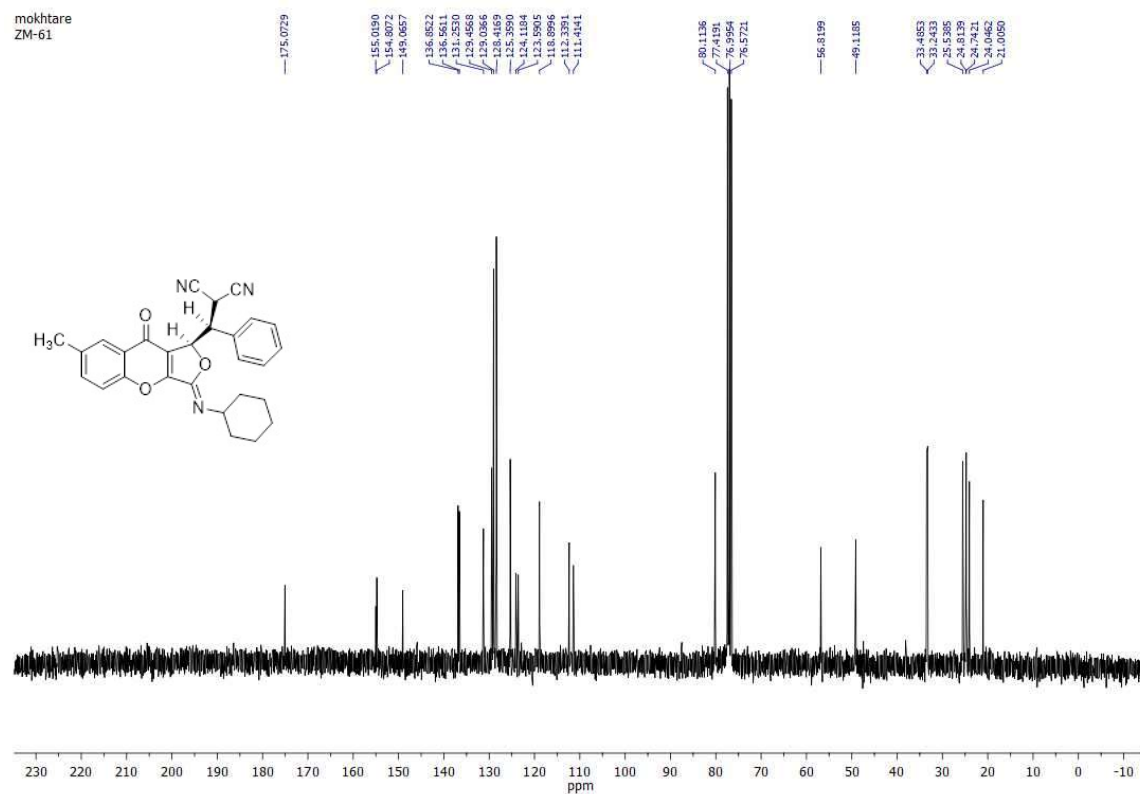

### HRMS of 4a

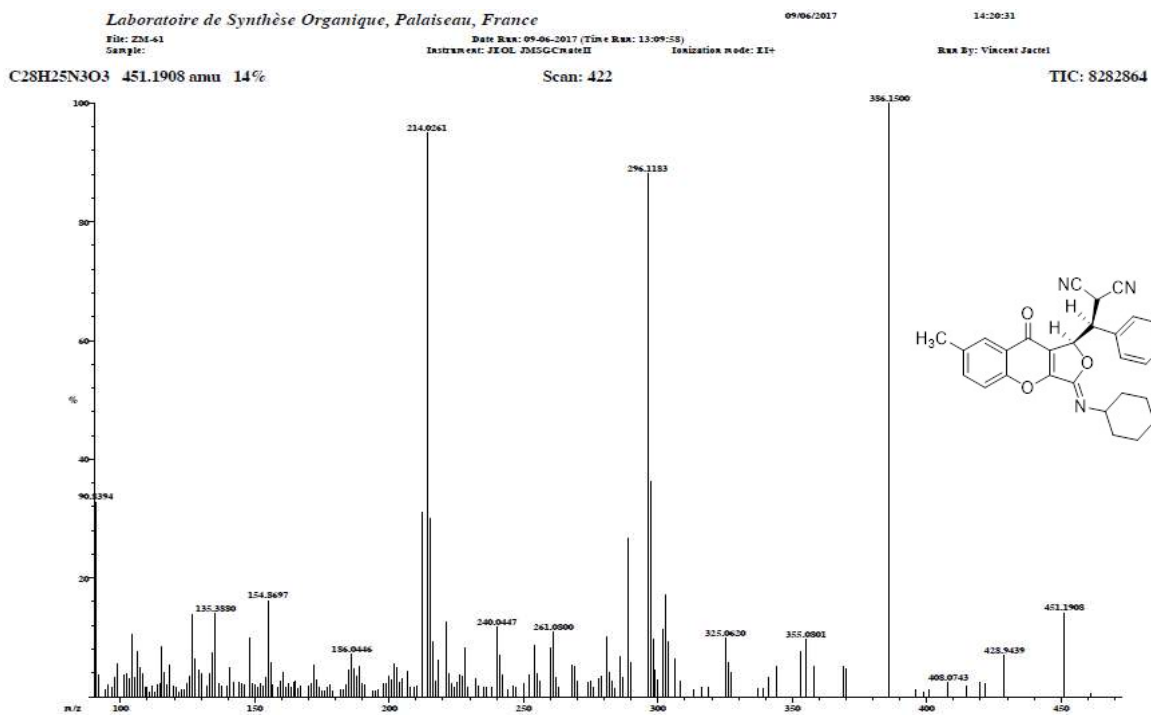

**FT-IR of 4b:**

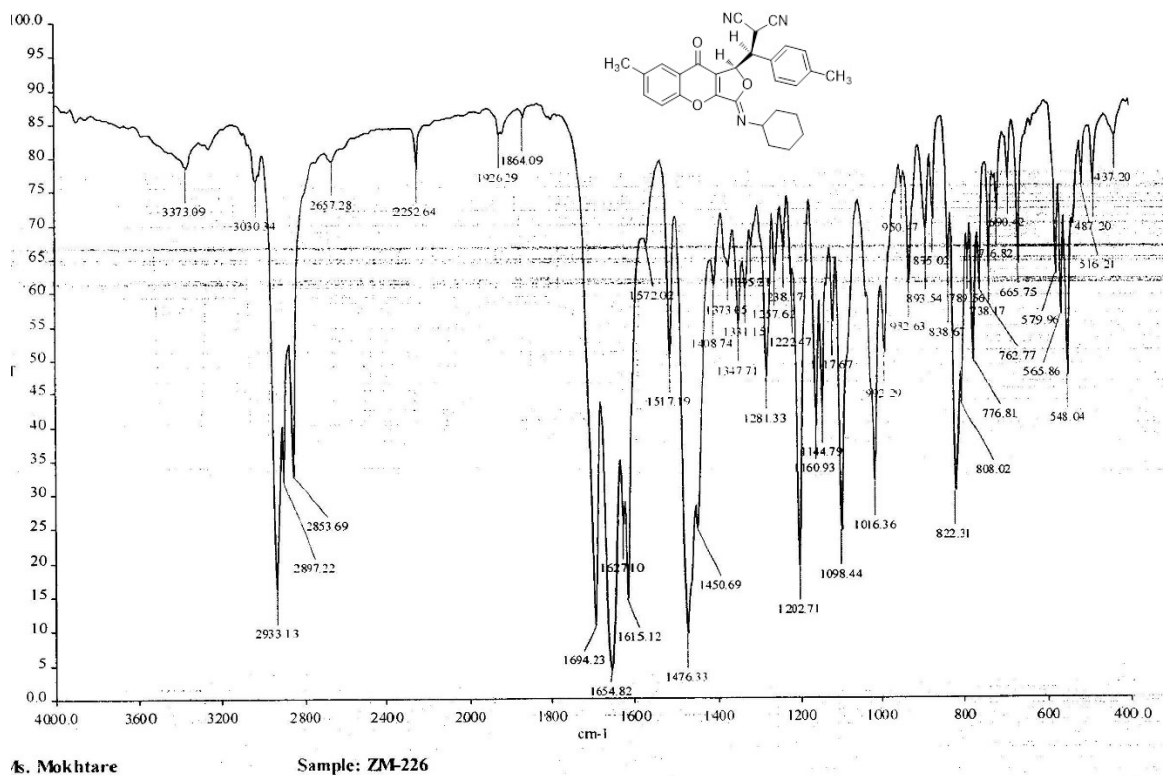

**<sup>1</sup>H NMR (300 MHz, CDCl<sub>3</sub>) of 4b:**

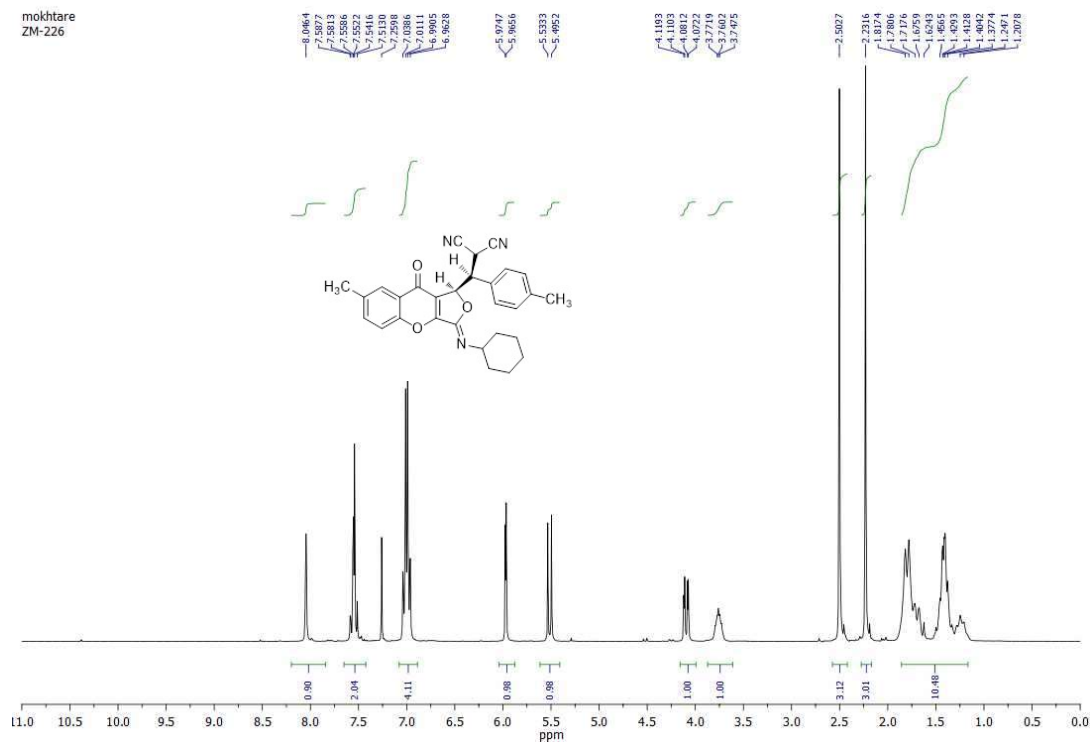

### <sup>13</sup>C NMR (75 MHz, CDCl<sub>3</sub>) of 4b:

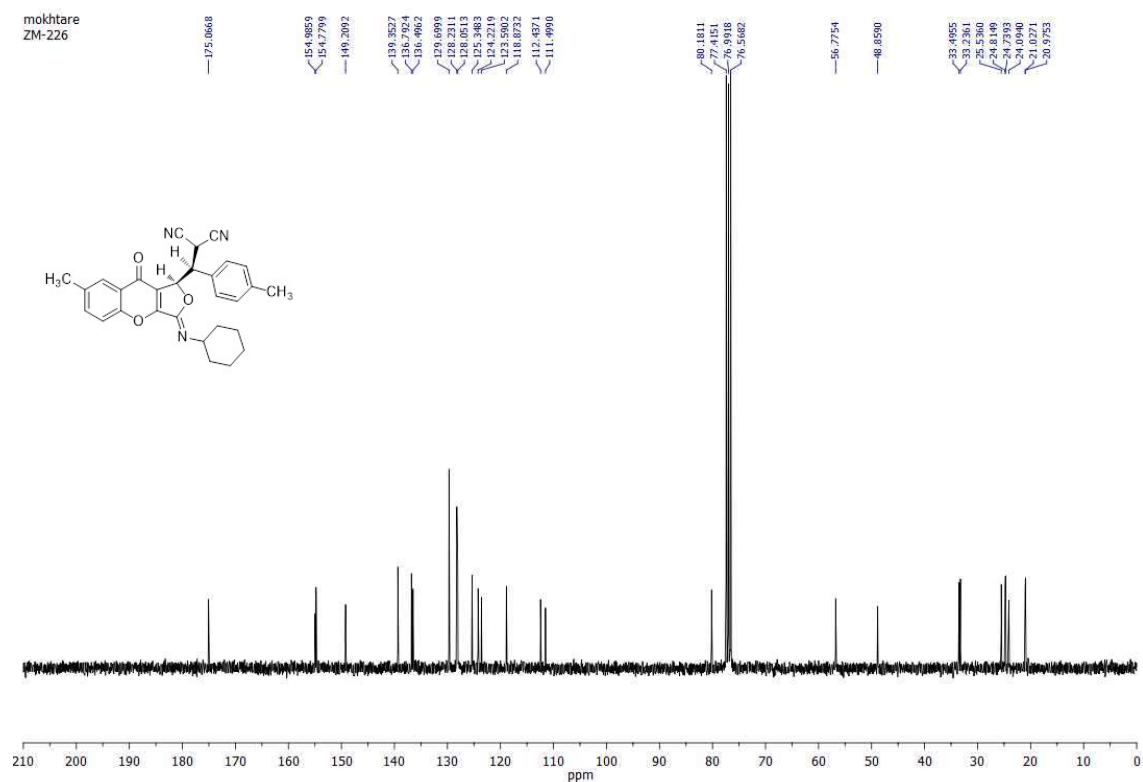

### FT-IR of 4c:

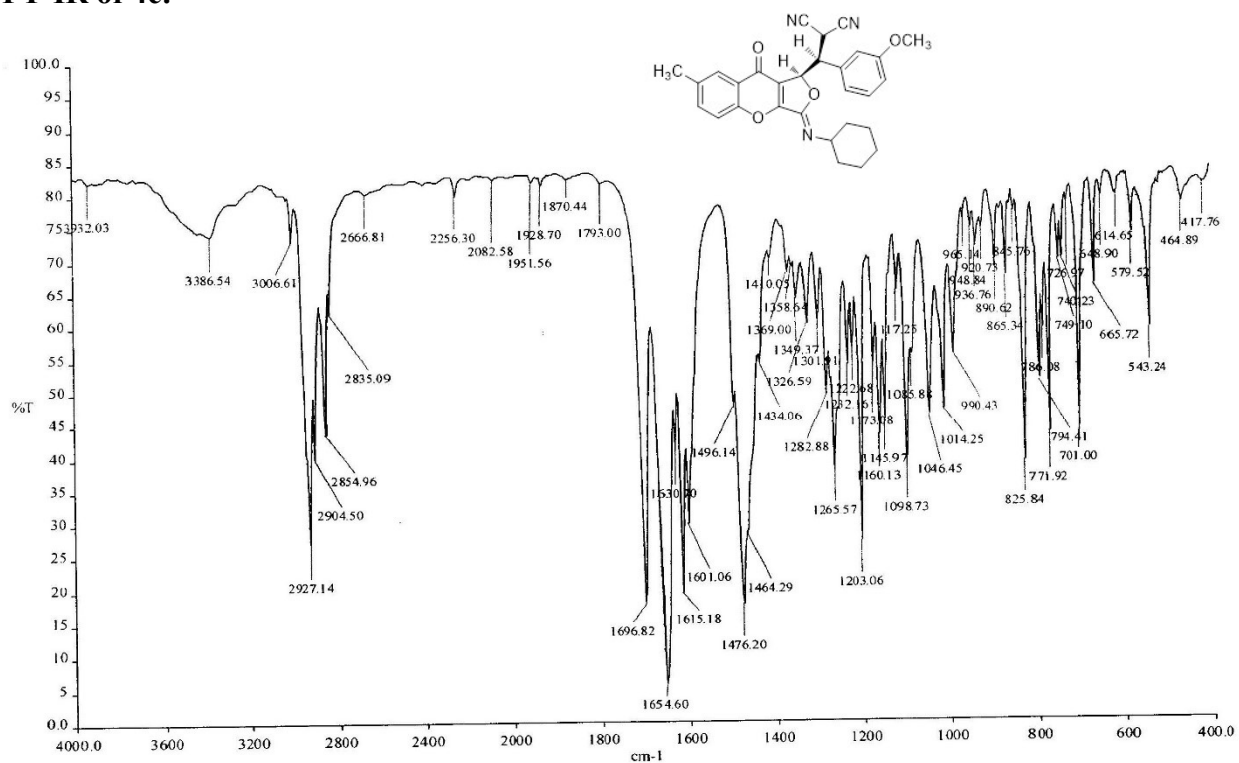

Ms. Mokhtare

Sample: ZM-283

### <sup>1</sup>H NMR (300 MHz, CDCl<sub>3</sub>) of 4c:

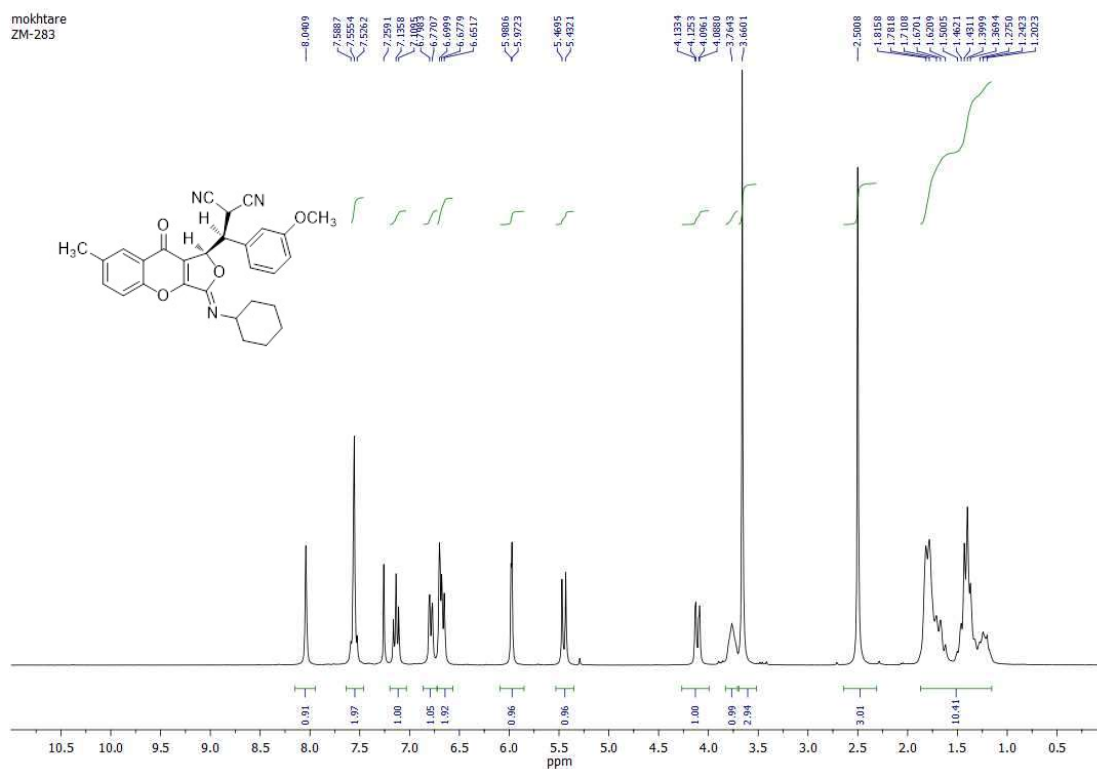

### <sup>13</sup>C NMR (75 MHz, CDCl<sub>3</sub>) of 4c:

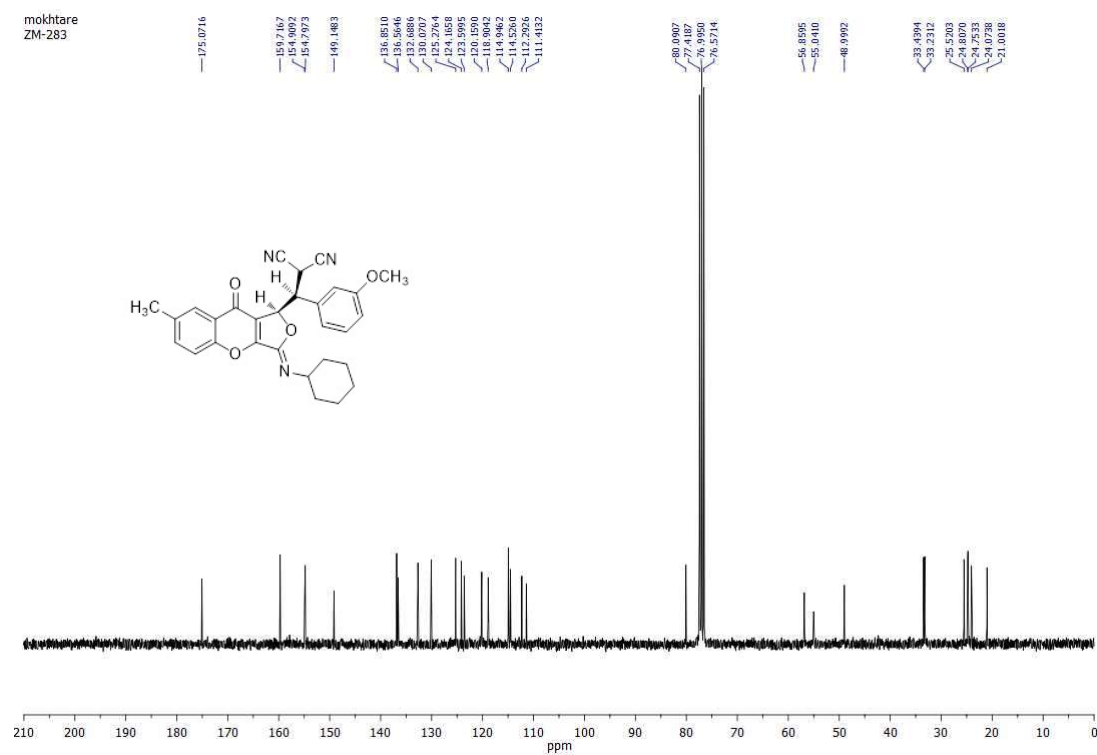

**FT-IR of 4d:**

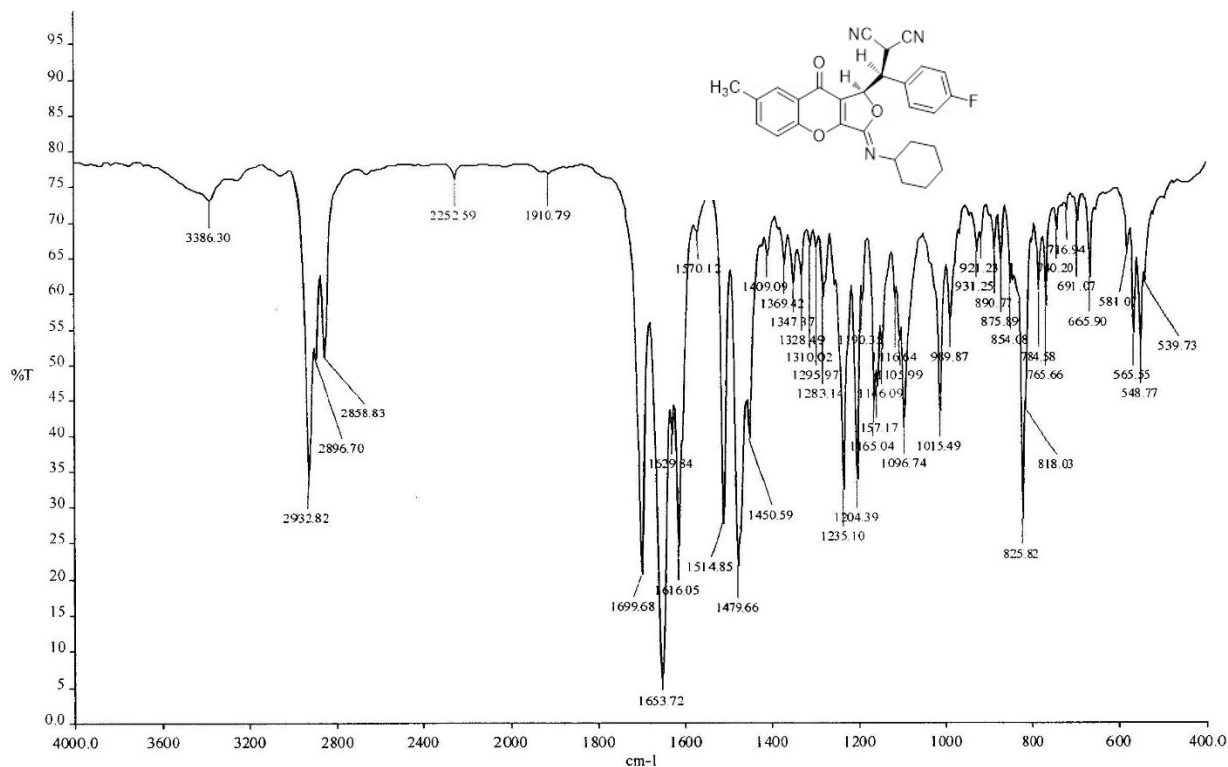

**Ms. Mokhtare Sample: ZM-256**  
**<sup>1</sup>H NMR (300 MHz, CDCl<sub>3</sub>) of 4d:**

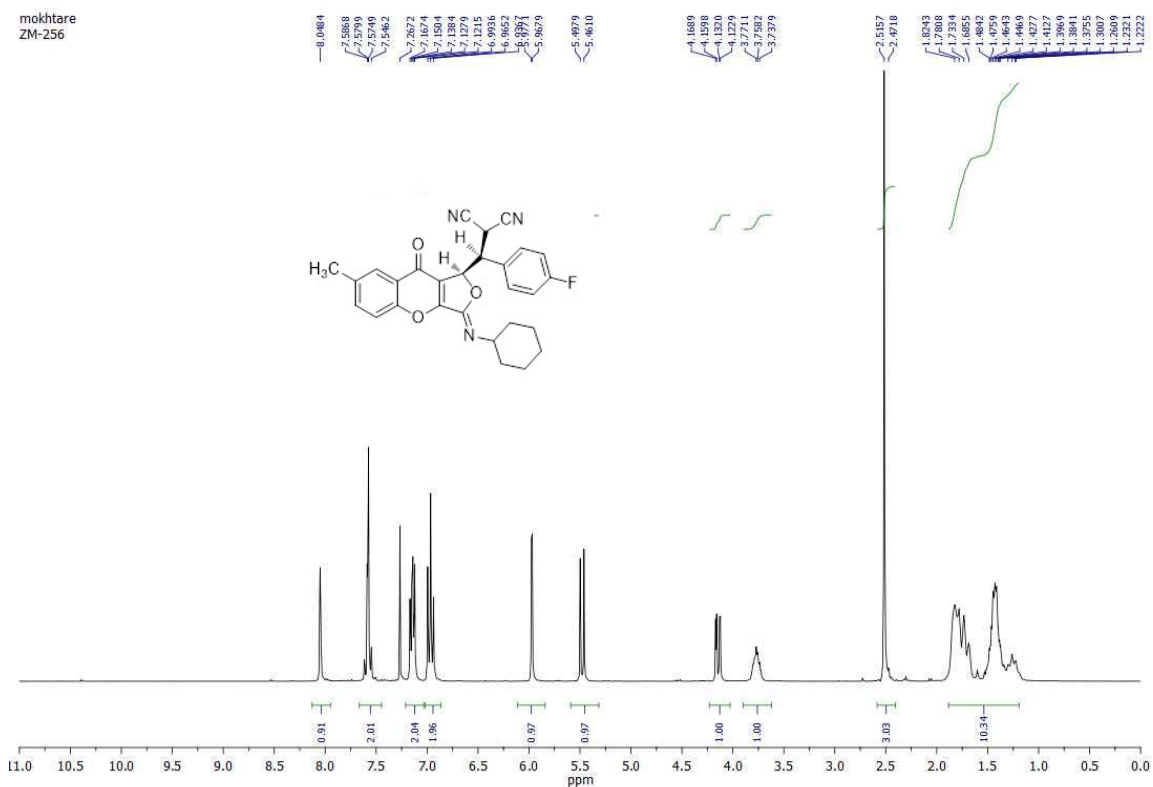



### $^{13}\text{C}$ NMR (75 MHz, $\text{CDCl}_3$ ) of 4d:

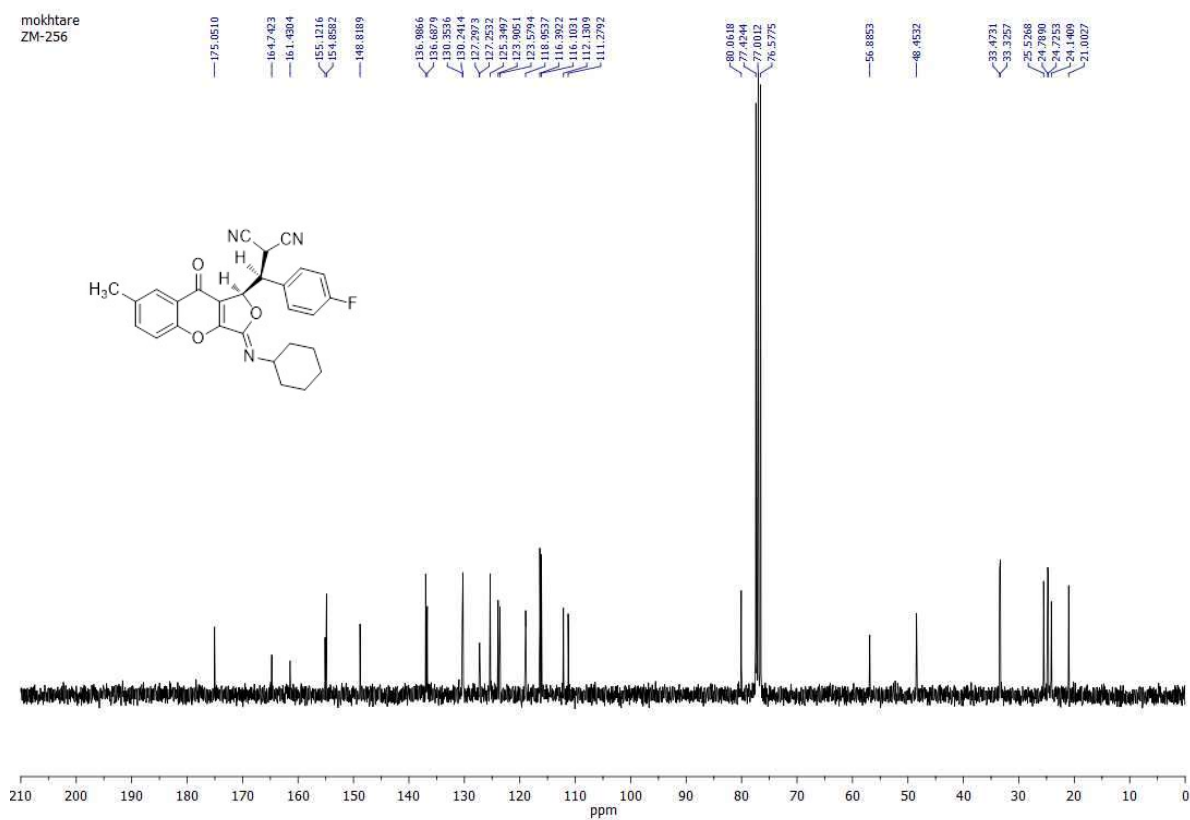

### FT-IR of 4e:

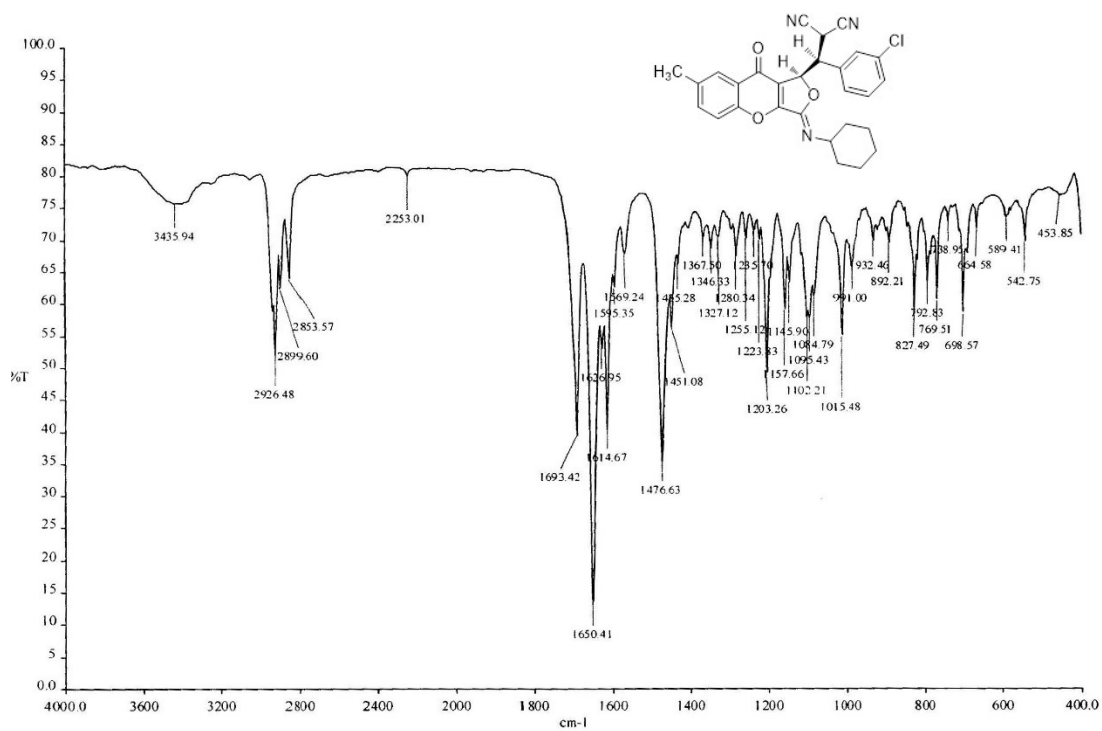

S. Mokhtare

Sample: ZM-91

### <sup>1</sup>H NMR (300 MHz, CDCl<sub>3</sub>) of 4e:

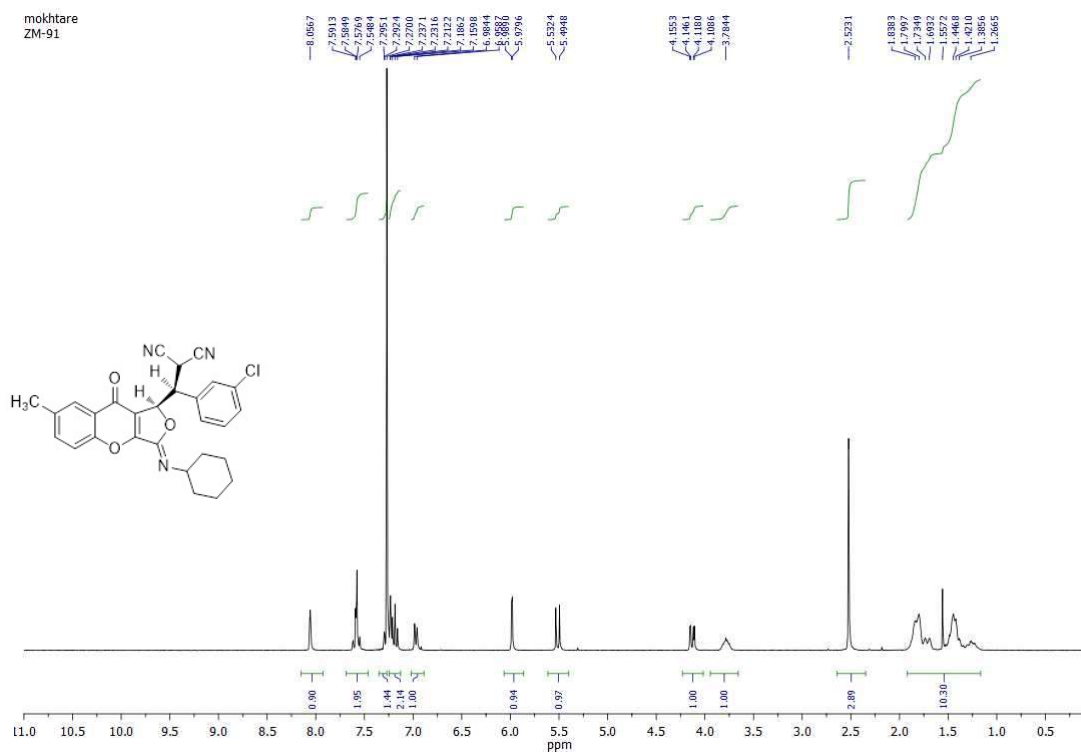

### <sup>13</sup>C NMR (75 MHz, CDCl<sub>3</sub>) of 4e:

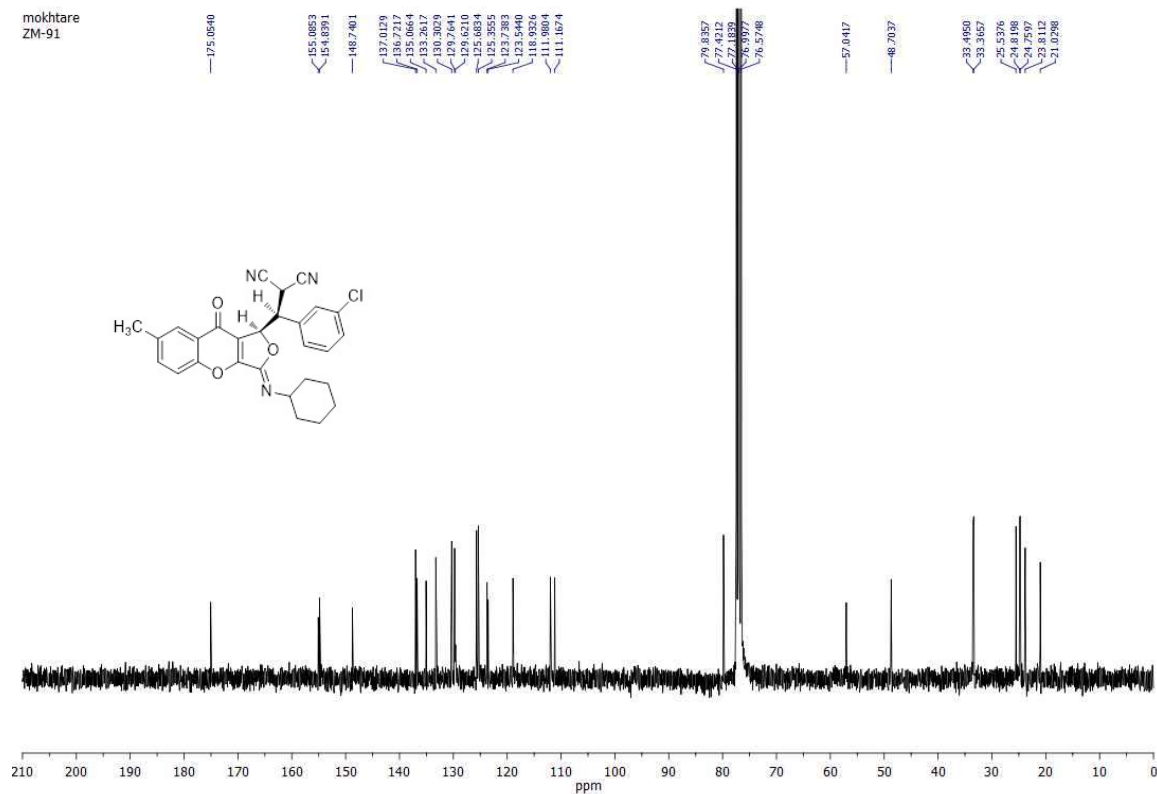

# HRMS of 4e:

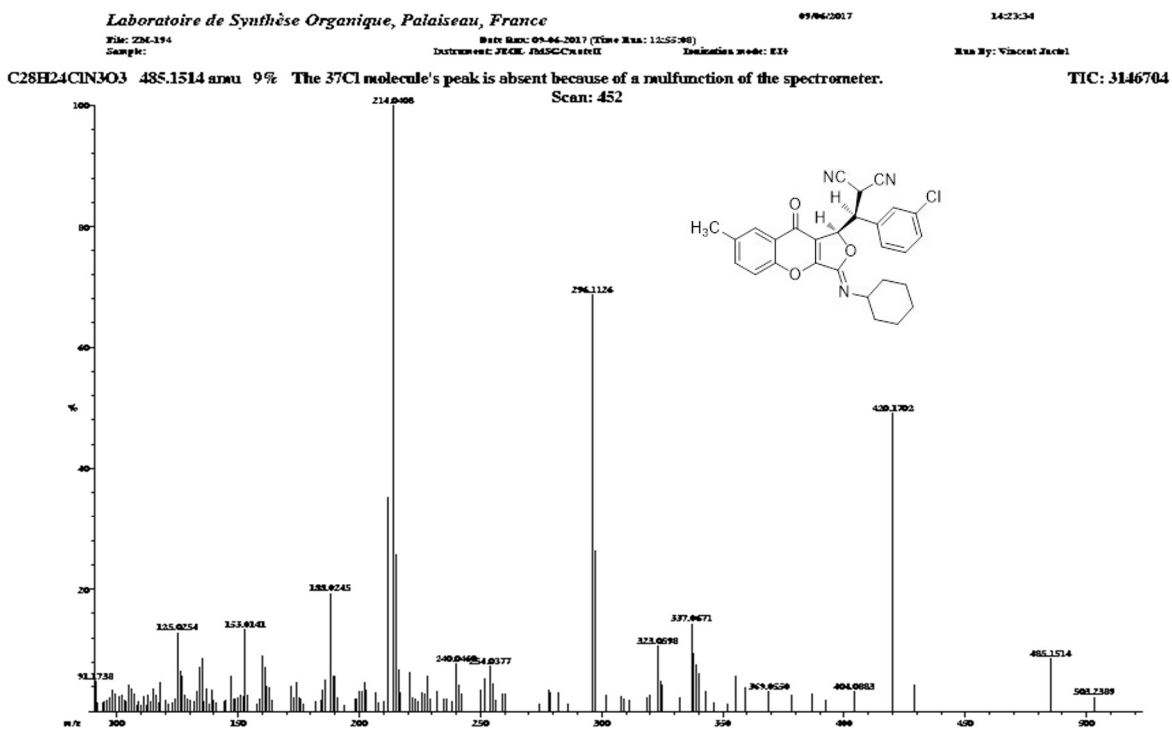

# FT-IR of 4f:

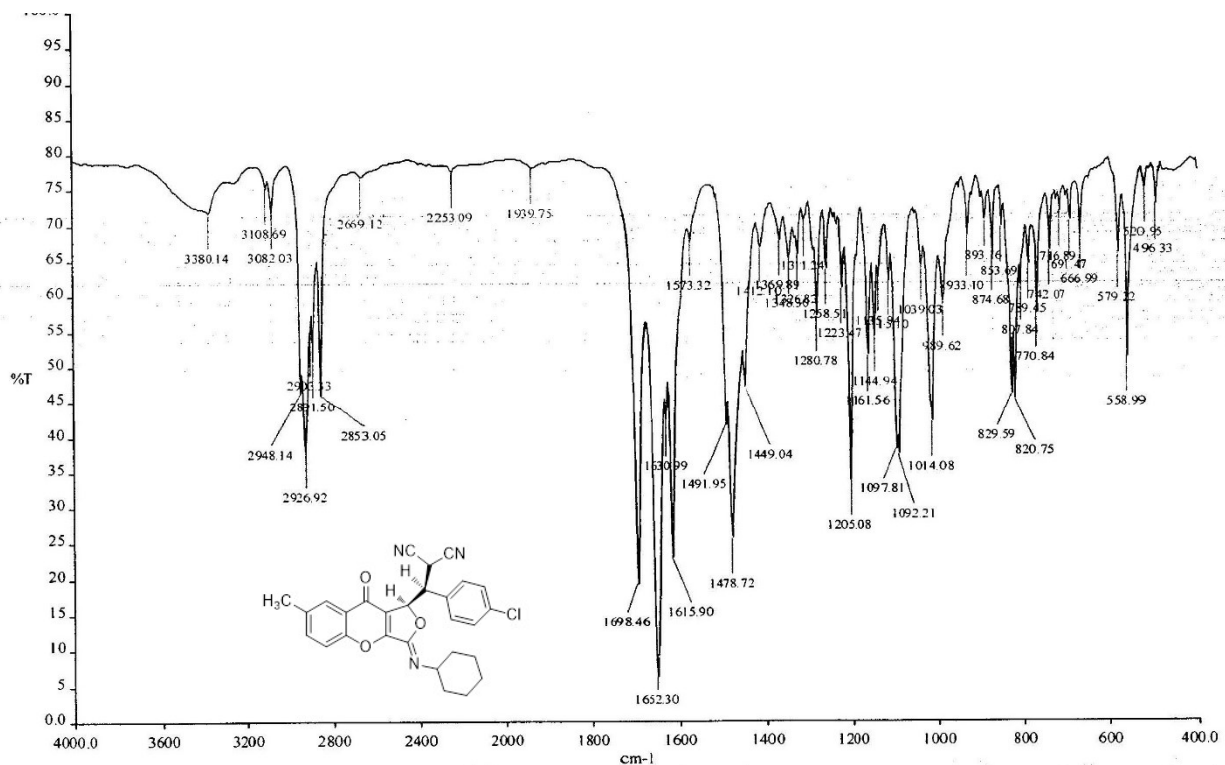

Ms. Mokhtare Sample: ZM-194

### $^1\text{H}$ NMR (300 MHz, $\text{CDCl}_3$ ) of 4f:

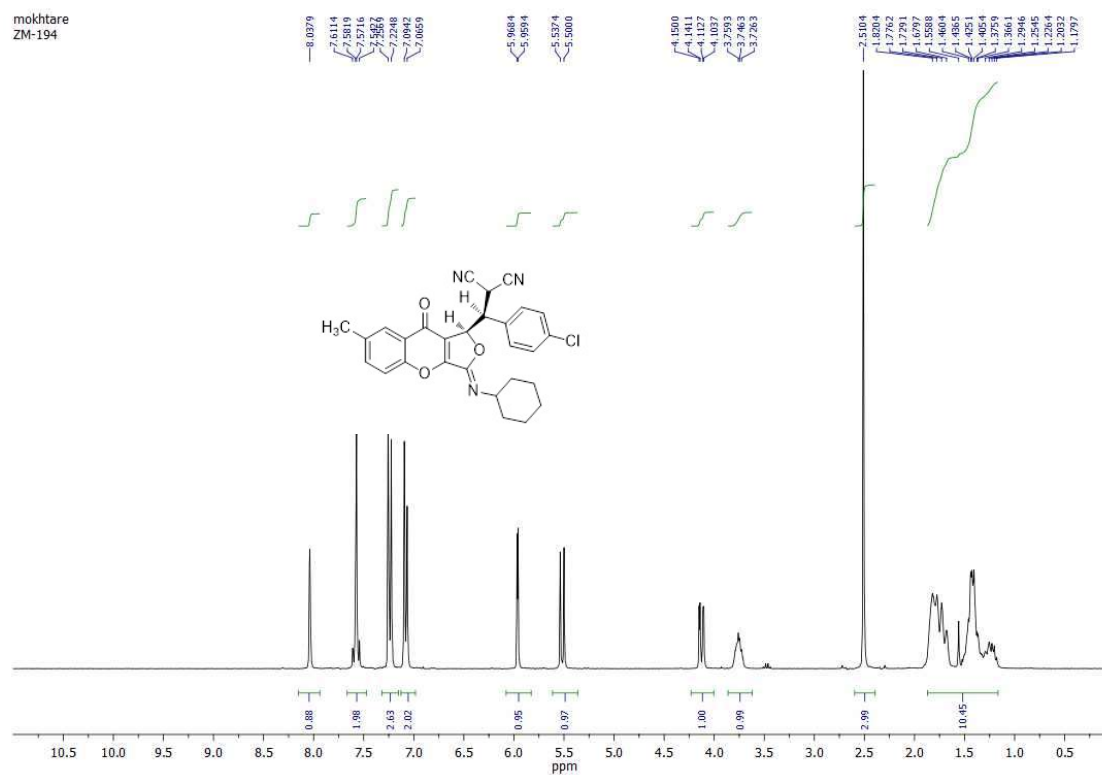

### $^{13}\text{C}$ NMR (75 MHz, $\text{CDCl}_3$ ) of 4f:

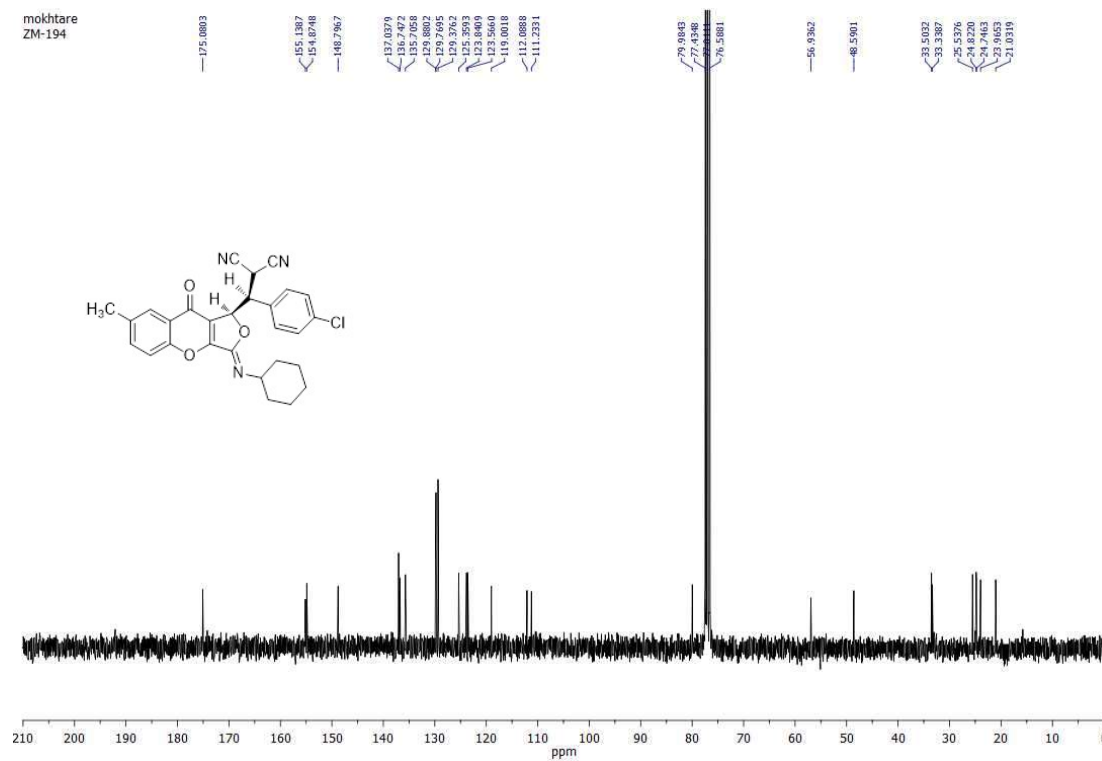

# HRMS of 4f:

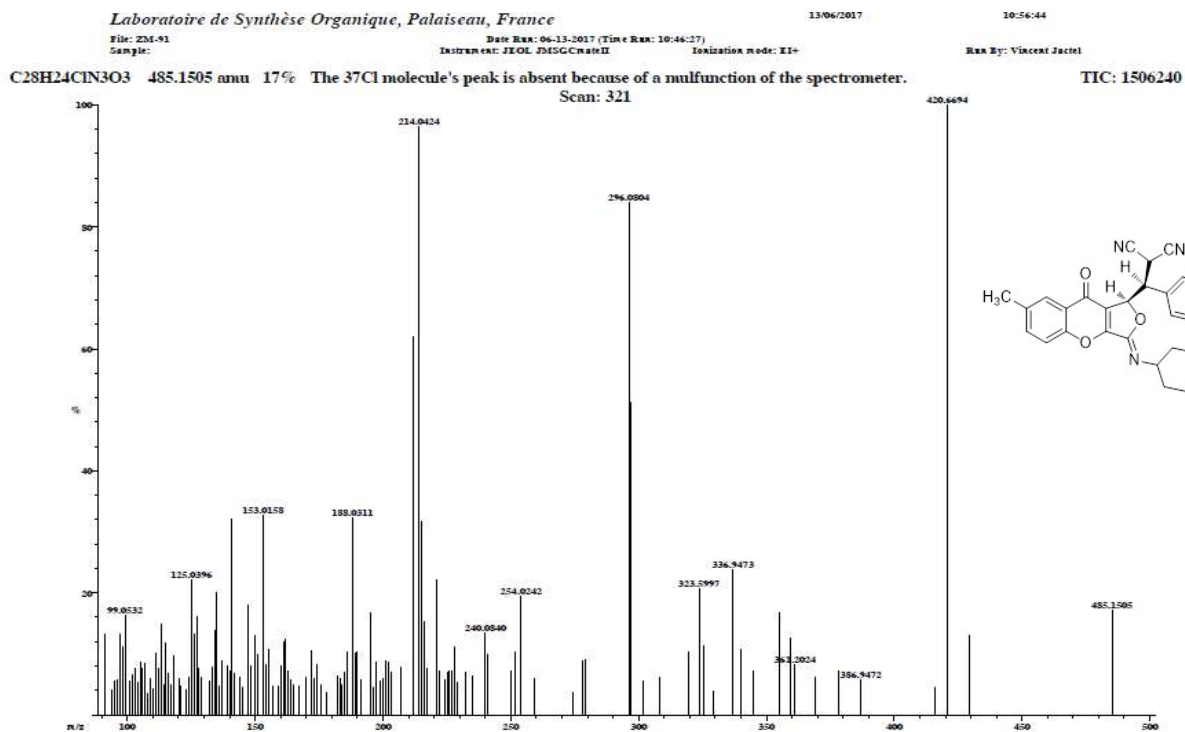

# FT-IR of 4g:

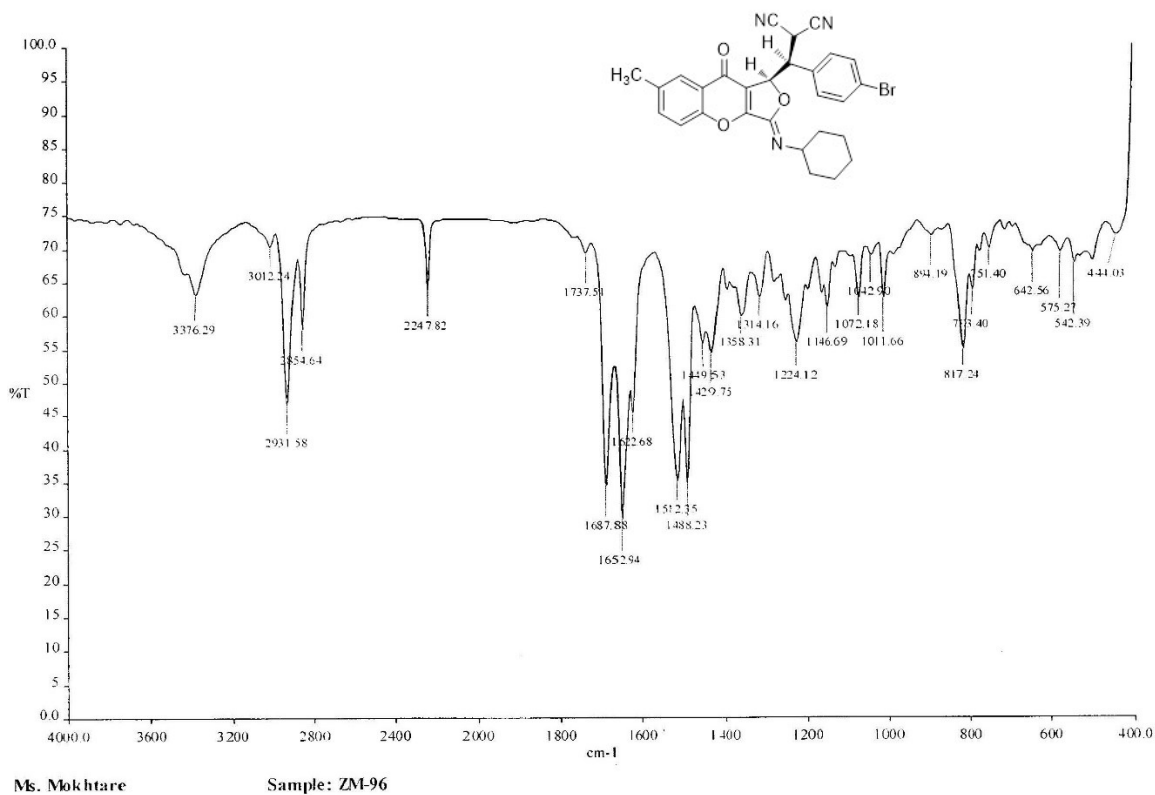

**<sup>1</sup>H NMR (300 MHz, CDCl<sub>3</sub>) of 4g:**

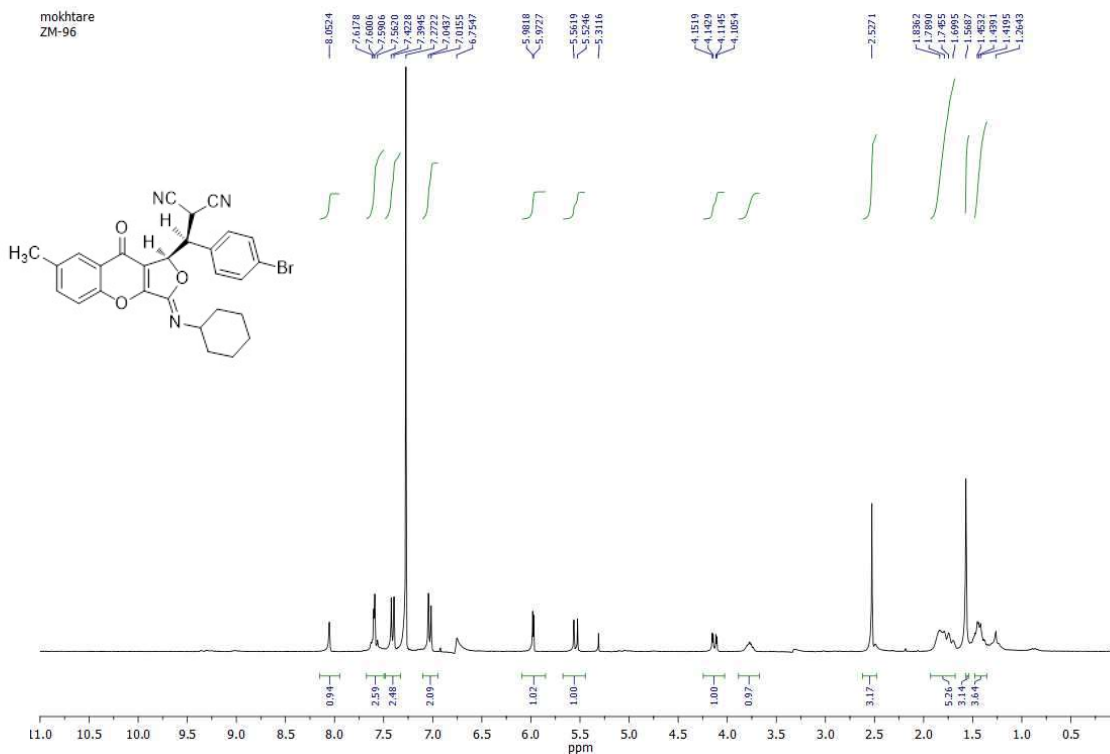

**<sup>13</sup>C NMR (75 MHz, CDCl<sub>3</sub>) of 4g:**

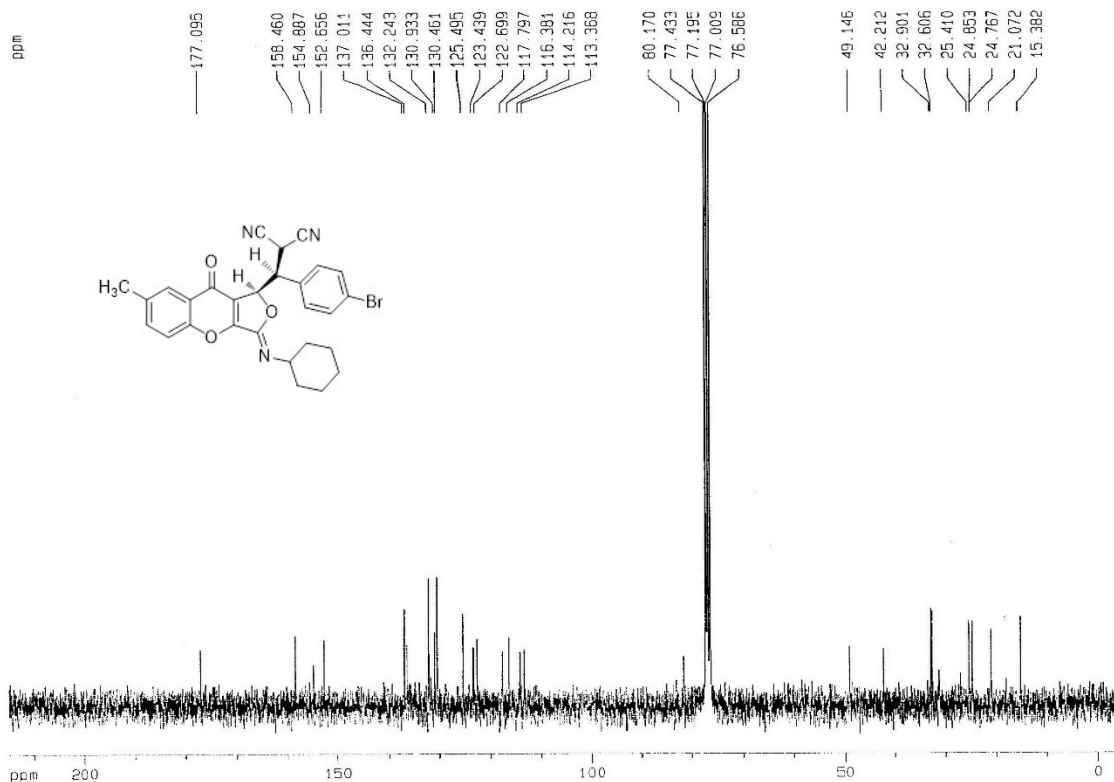

# HRMS of 4g:

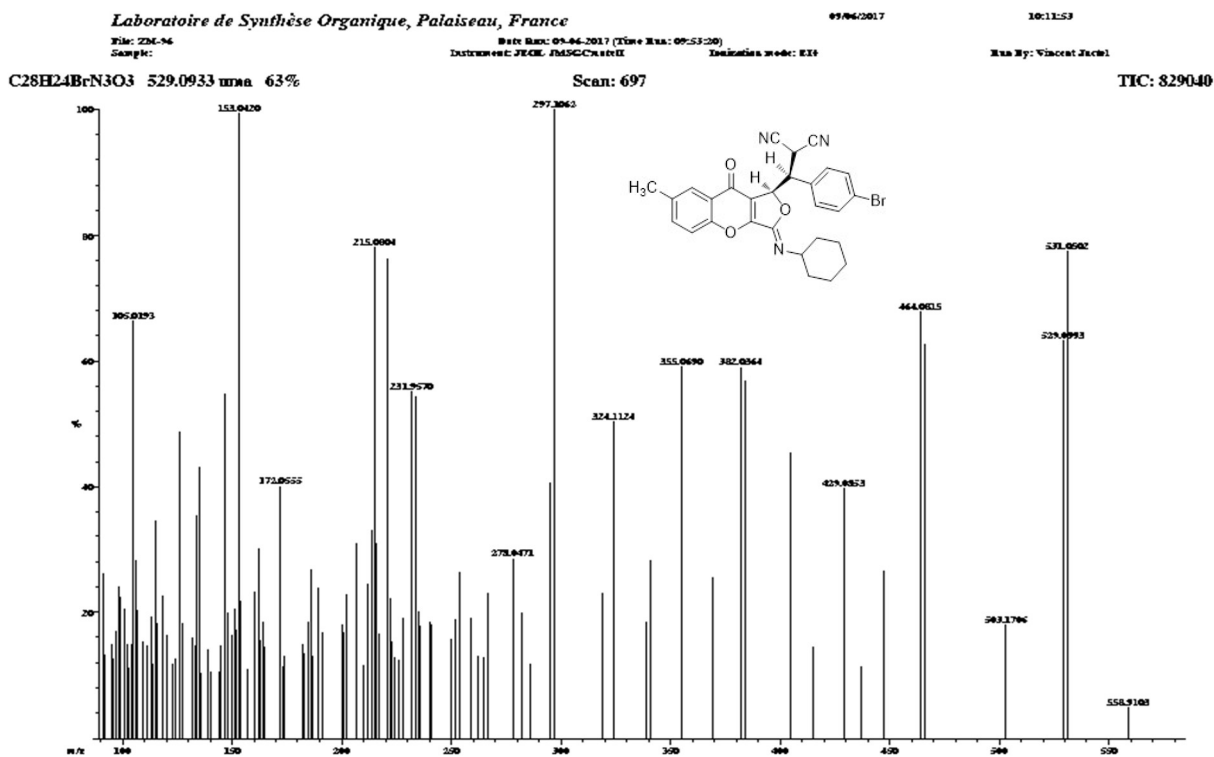

# FT-IR of 4h:

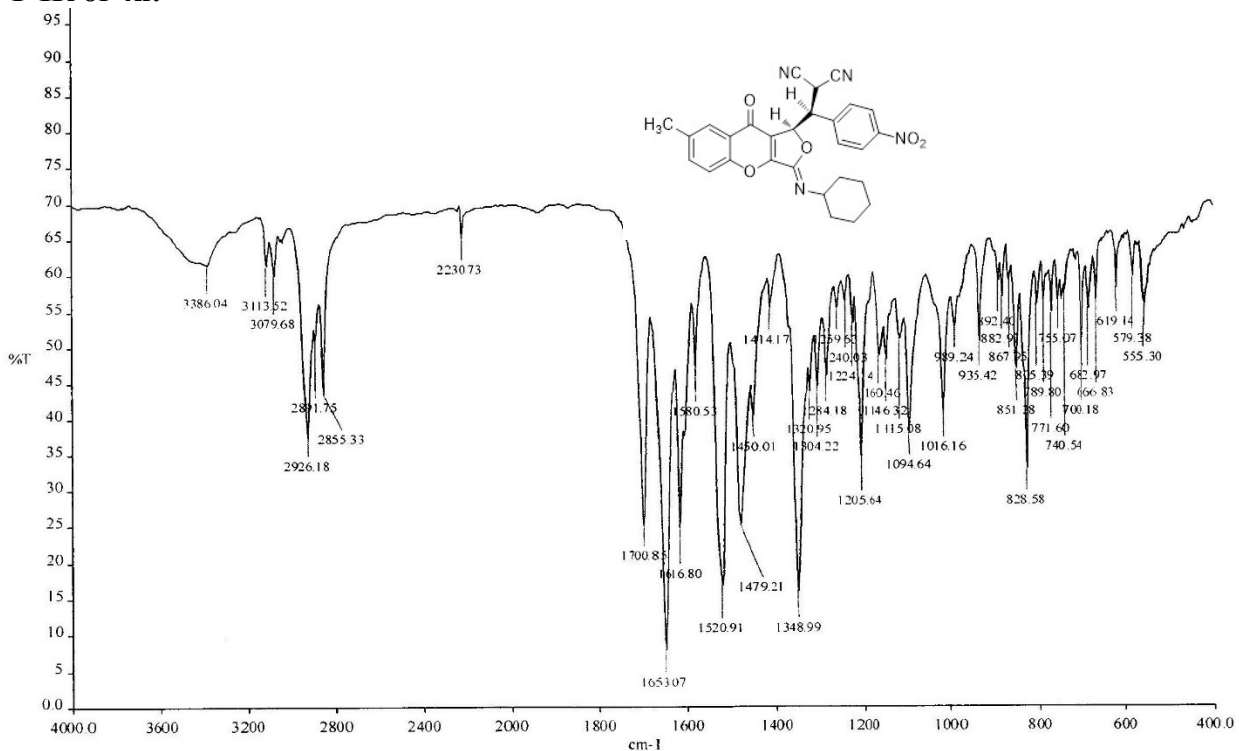

Ms. Mokhtare

Sample: ZM-72

### <sup>1</sup>H NMR (300 MHz, CDCl<sub>3</sub>) of 4h:

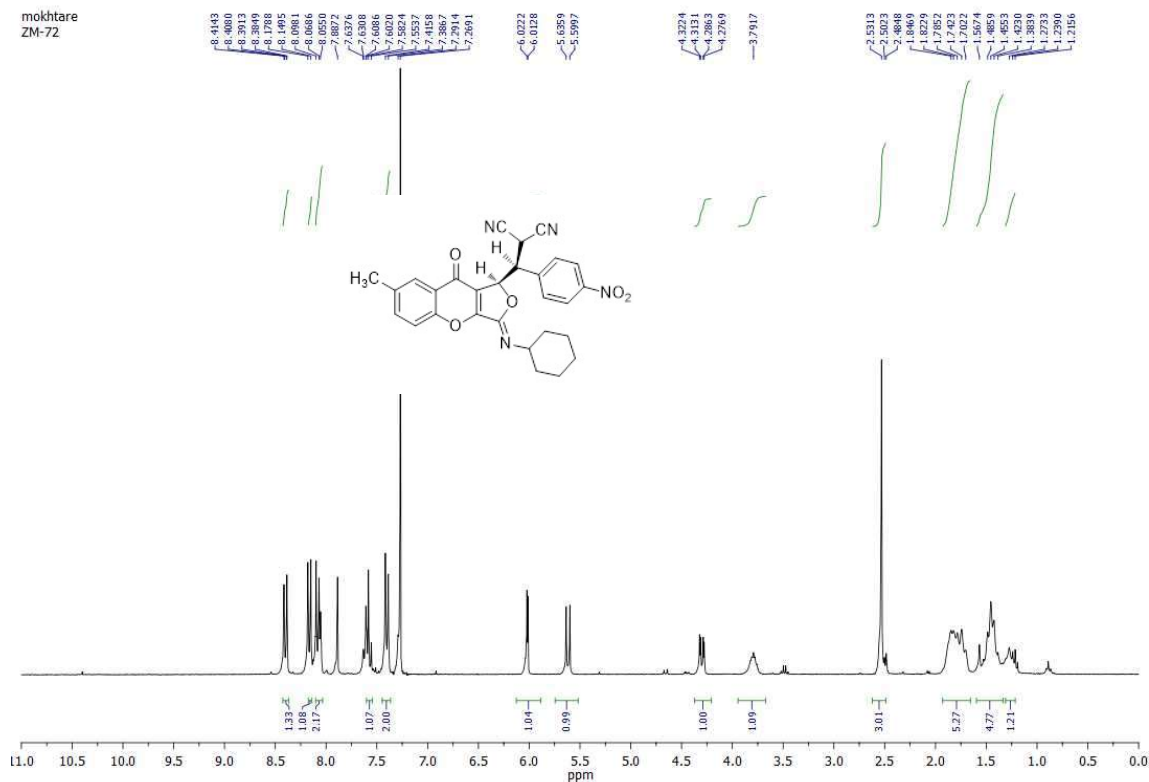

### <sup>13</sup>C NMR (75 MHz, CDCl<sub>3</sub>) of 4h:

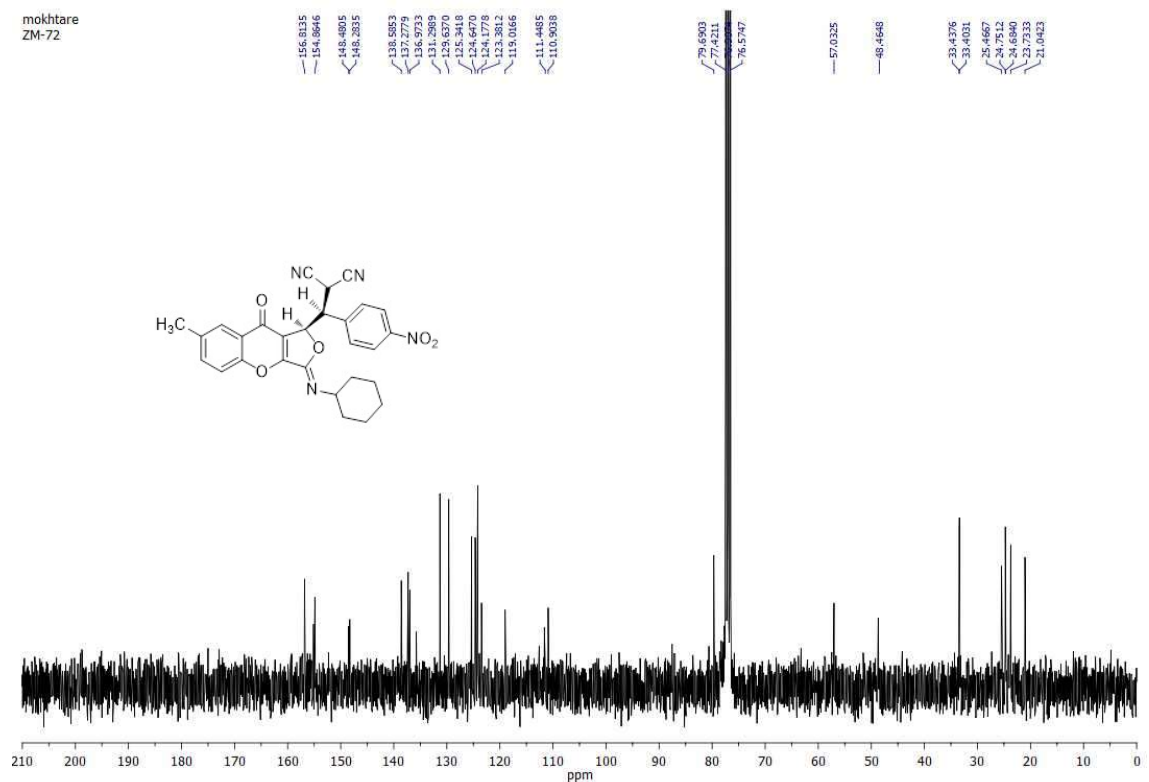



**FT-IR of 4i:**

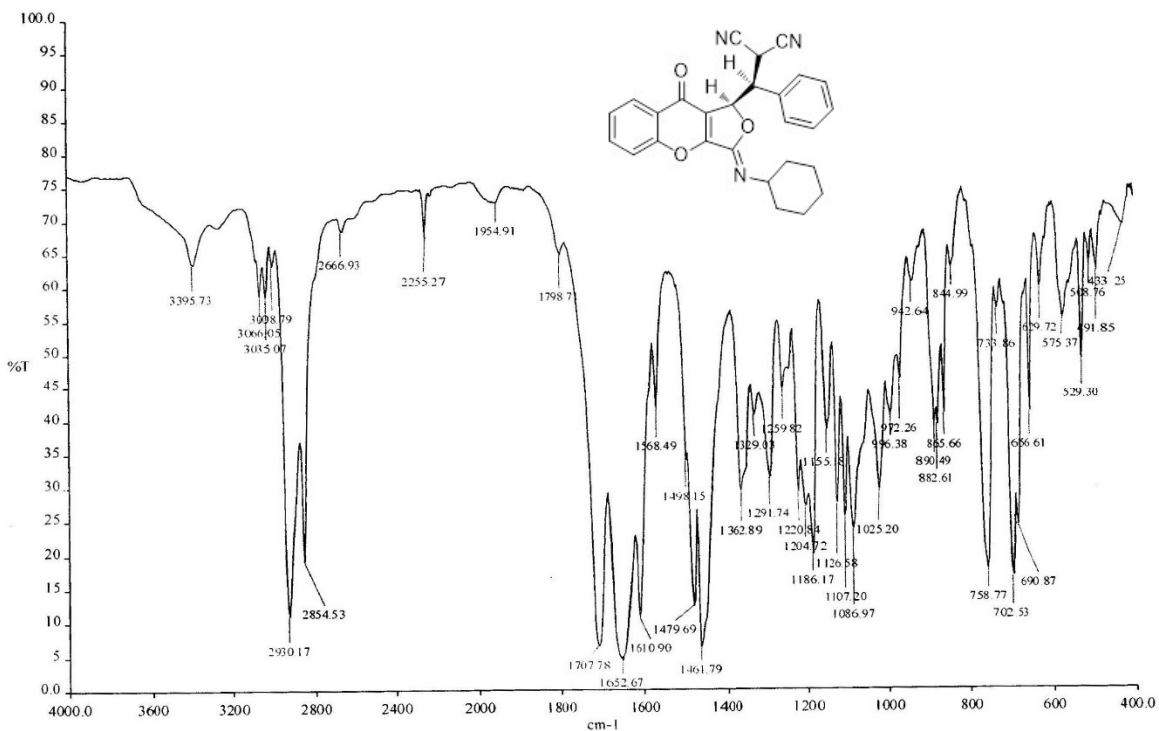

Ms. Mokhtare

Sample: ZM 67

**<sup>1</sup>H NMR (300 MHz, CDCl<sub>3</sub>) of 4i:**

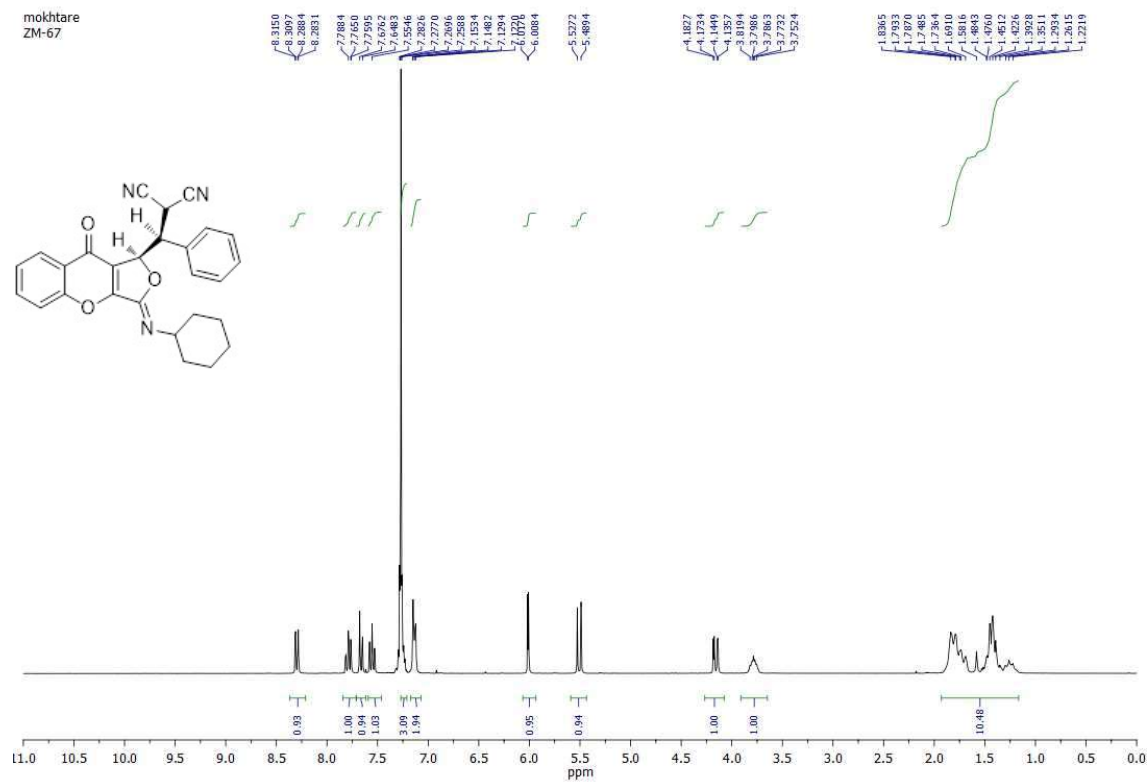

**<sup>13</sup>C NMR (75 MHz, CDCl<sub>3</sub>) of 4i:**

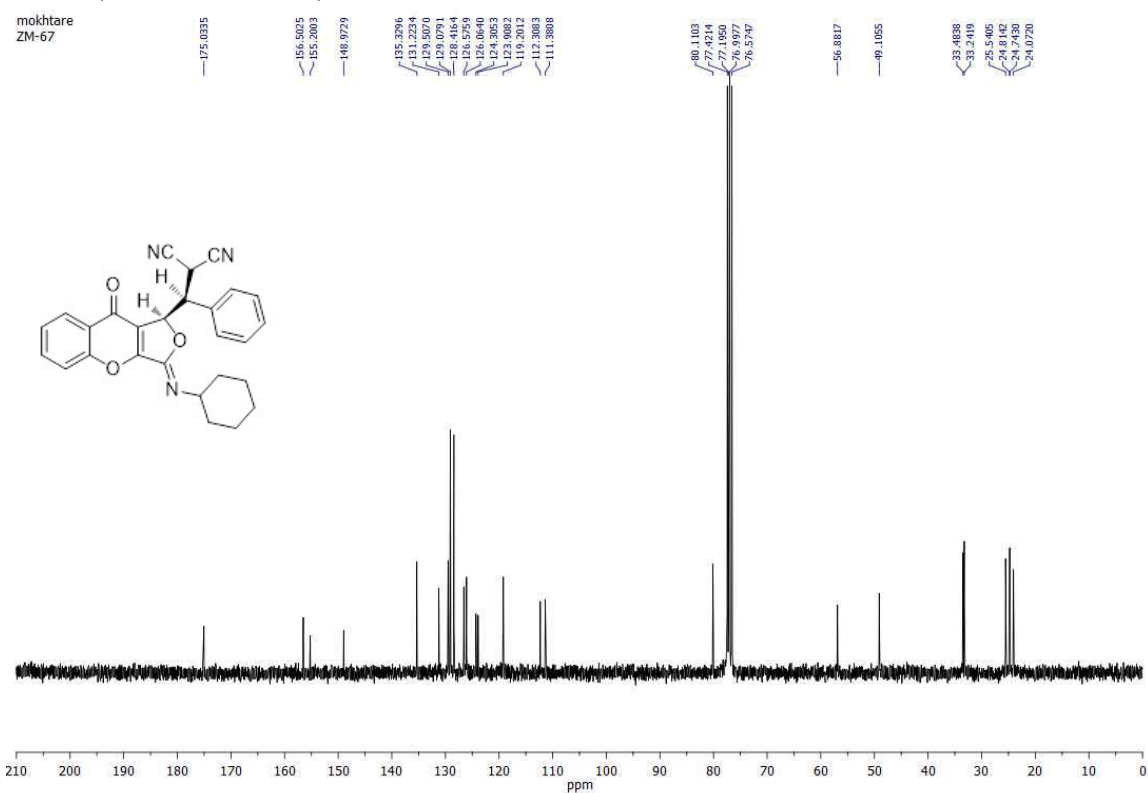

**FT-IR of 4j:**

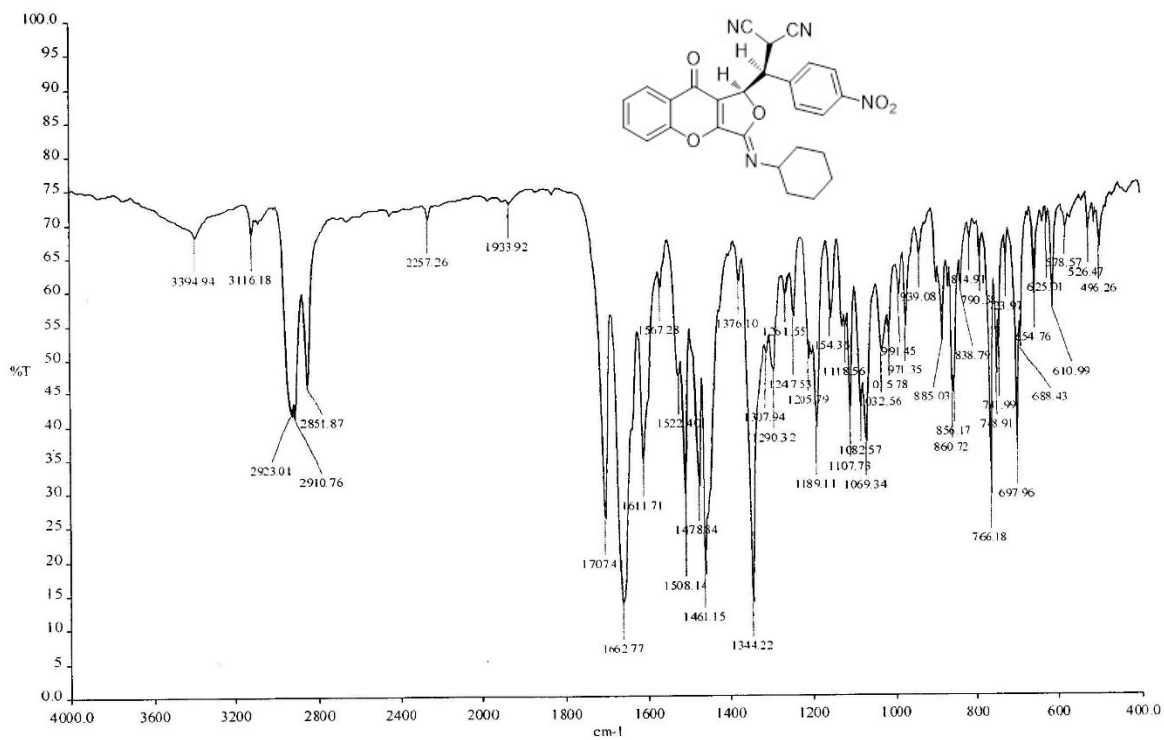

Ms. Mokhtare

Sample: ZM-82

### <sup>1</sup>H NMR (300 MHz, CDCl<sub>3</sub>) of 4j:

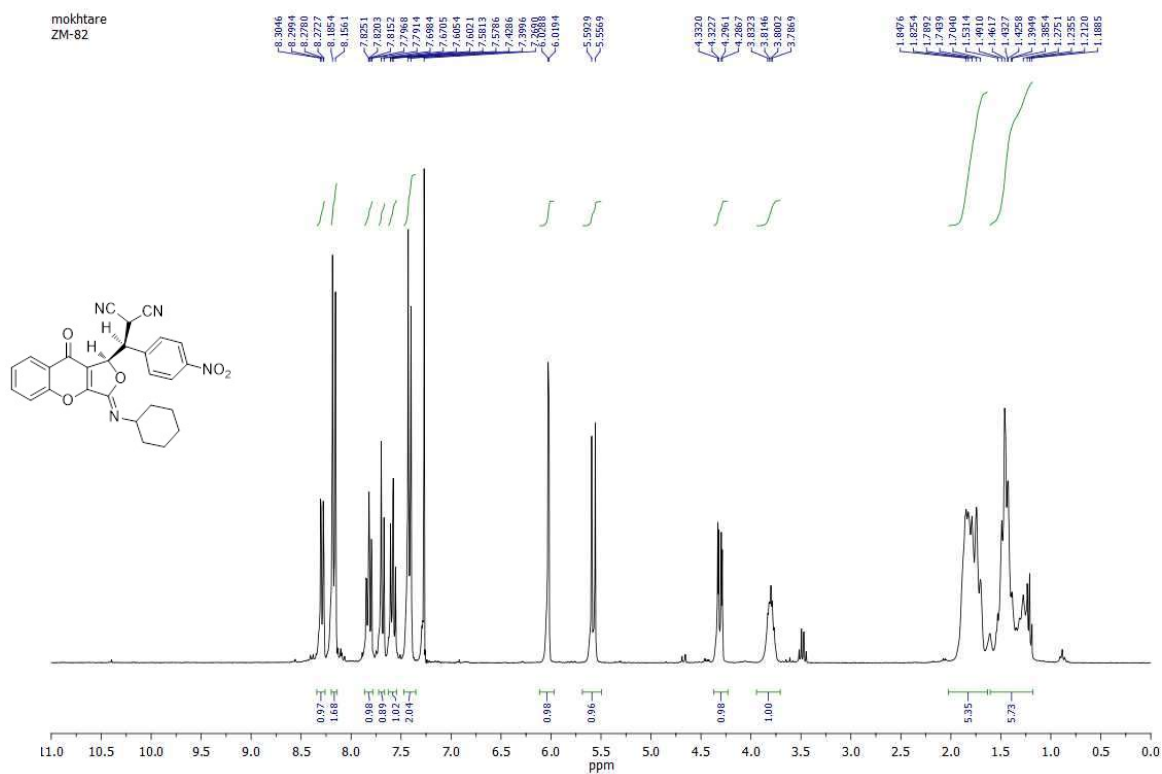

### <sup>13</sup>C NMR (75 MHz, CDCl<sub>3</sub>) of 4j:

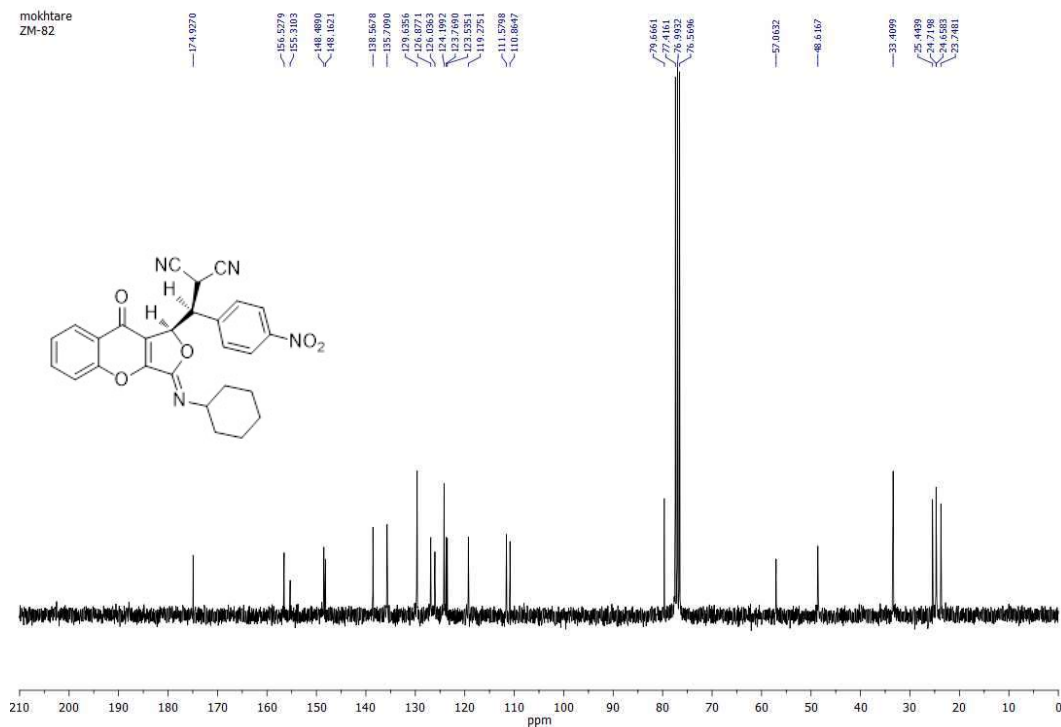

# HRMS of 4j:

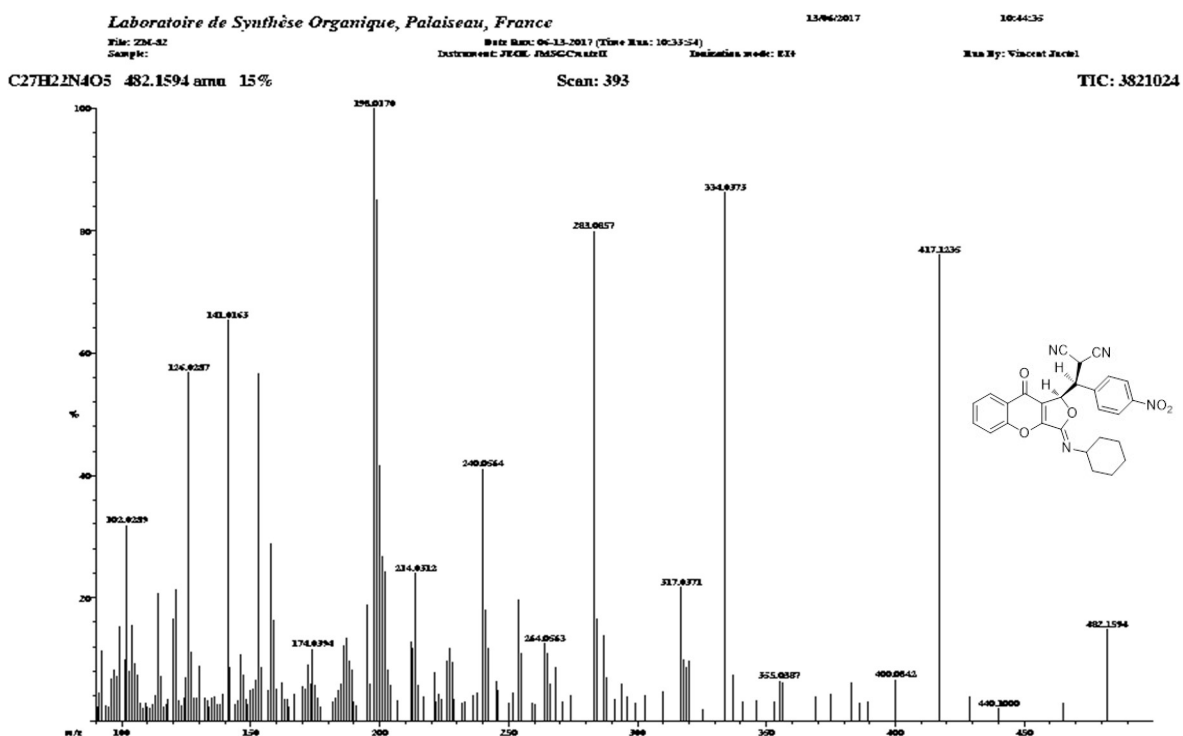

# FT-IR of 4k:

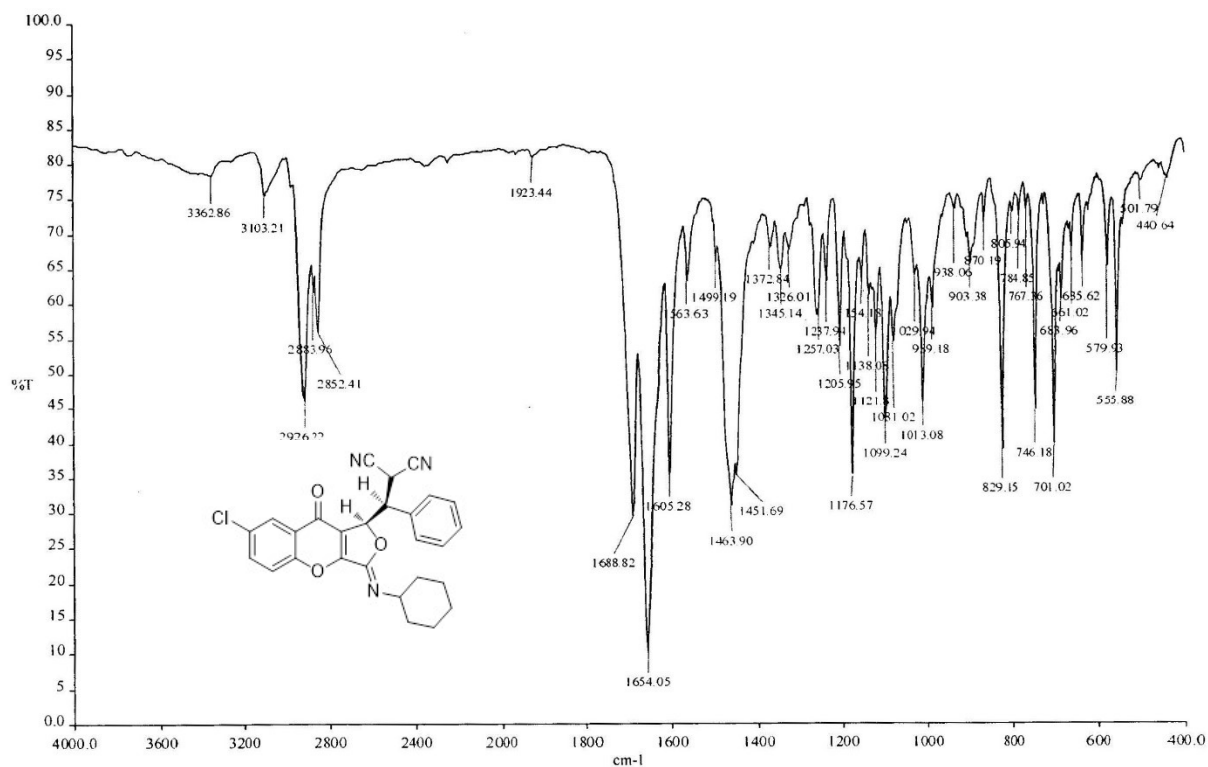

Ms. Mokhtare

Sample: ZM-70

### <sup>1</sup>H NMR (300 MHz, CDCl<sub>3</sub>) of 4k:

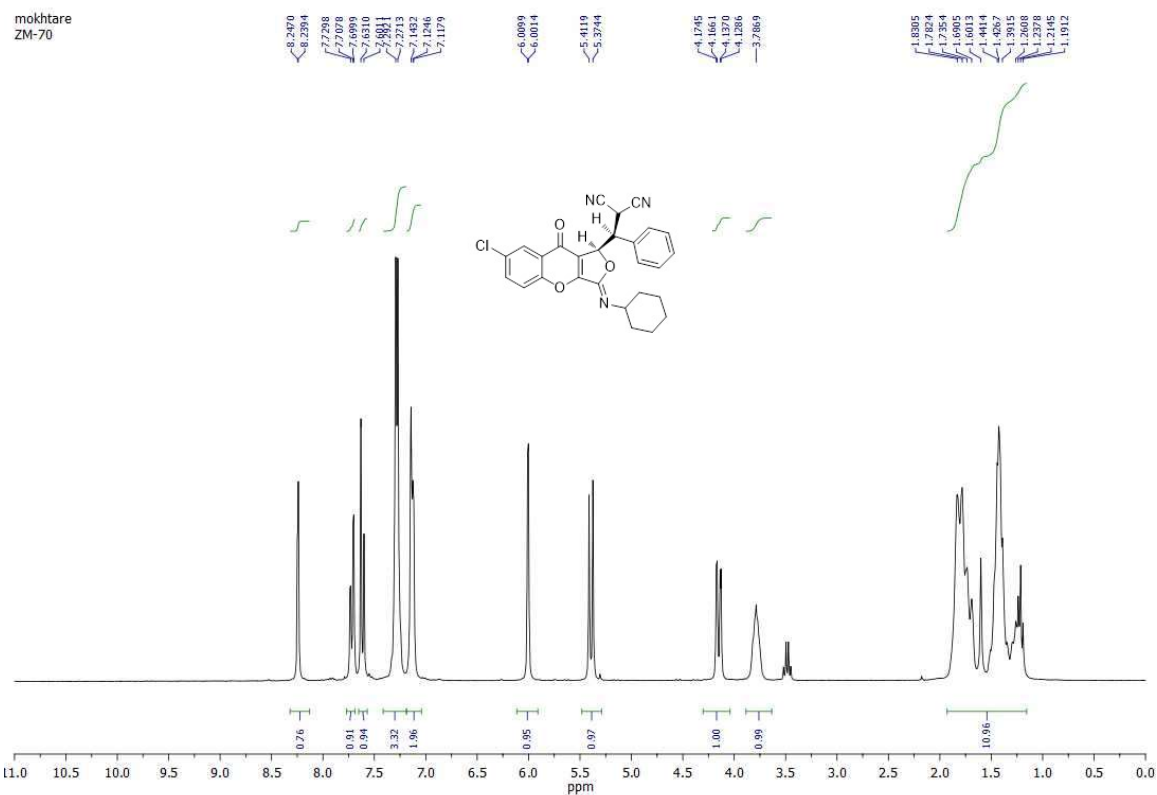

### <sup>13</sup>C NMR (75 MHz, CDCl<sub>3</sub>) of 4k:

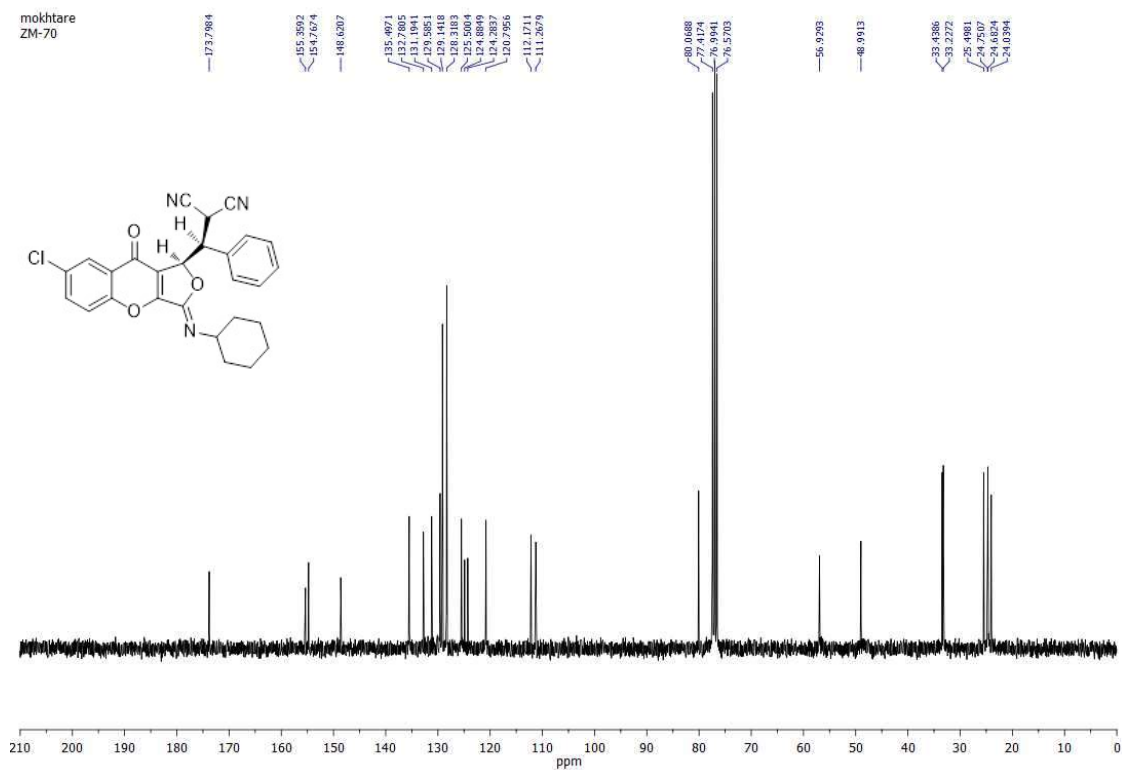

# HRMS of 4k:

Laboratoire de Synthèse Organique, Palaiseau, France

09/06/2007

15:38:47

File: ZM-70

Date Run: 09-06-2017 (Time Run: 15:34:34)

Instrument: JEOL JMSGCX5000

Injection mode: ESI+

Run By: Vincent Jozel

C<sub>27</sub>H<sub>22</sub>ClN<sub>3</sub>O<sub>3</sub> 471.1349 amu 12% The <sup>37</sup>Cl molecule's peak is absent because of a malfunction of the spectrometer.

TIC: 2701152

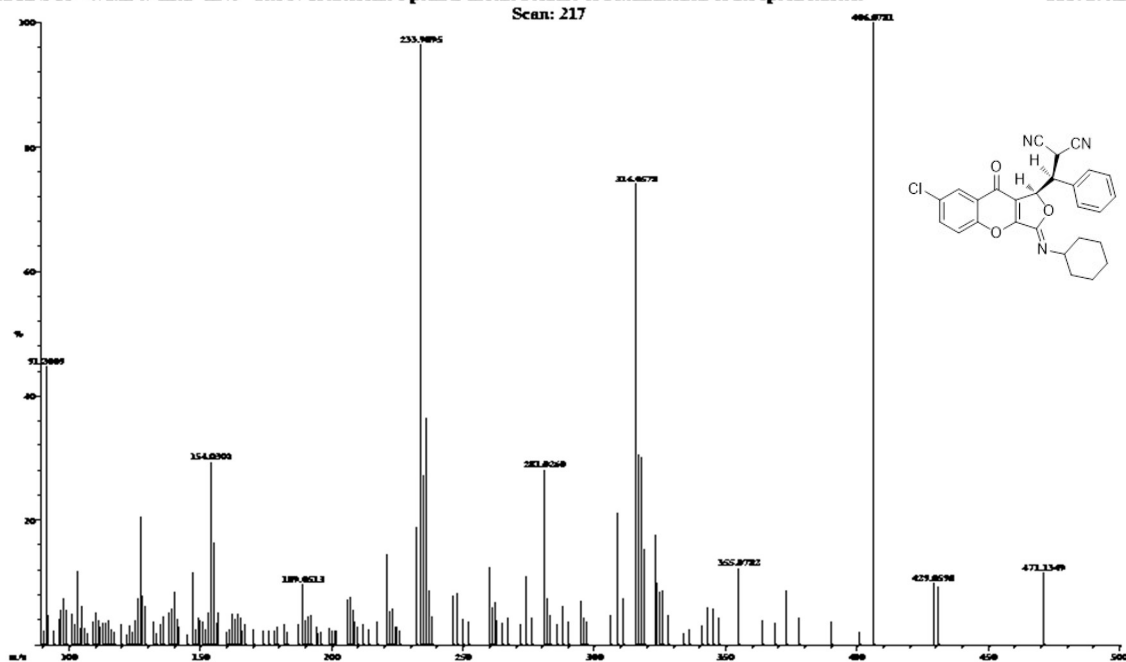

# FT-IR of 4l:

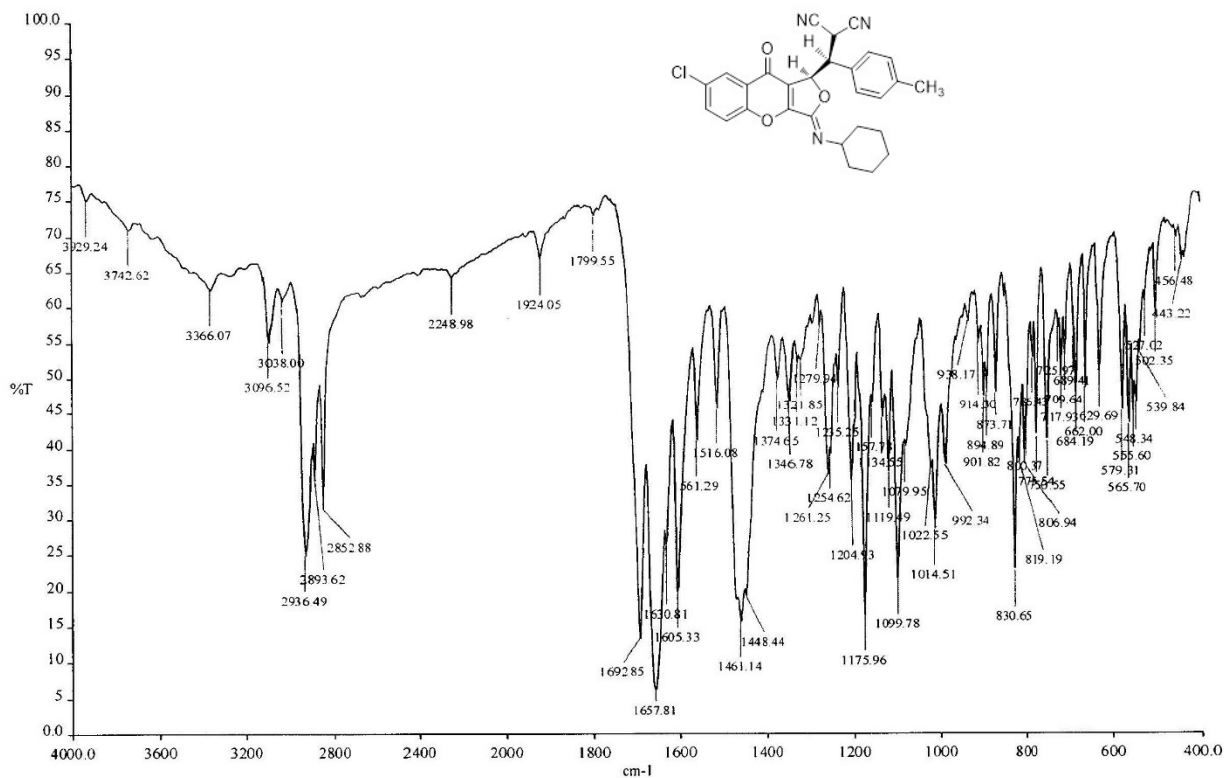

Ms. Mokhtare

Sample: ZM-264

# <sup>1</sup>H NMR (300 MHz, CDCl<sub>3</sub>) of 4l:

mokhtare  
ZM-264

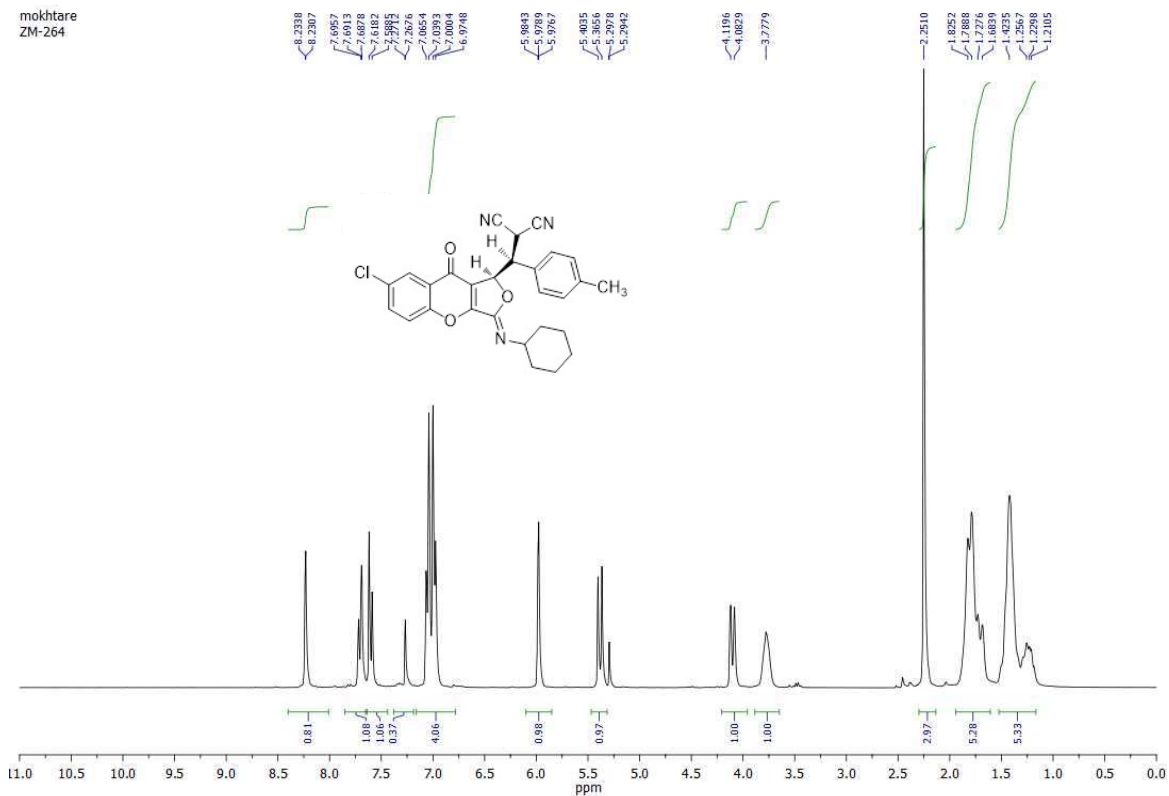

# <sup>13</sup>C NMR (75 MHz, CDCl<sub>3</sub>) of 4l:

mokhtare  
ZM-264

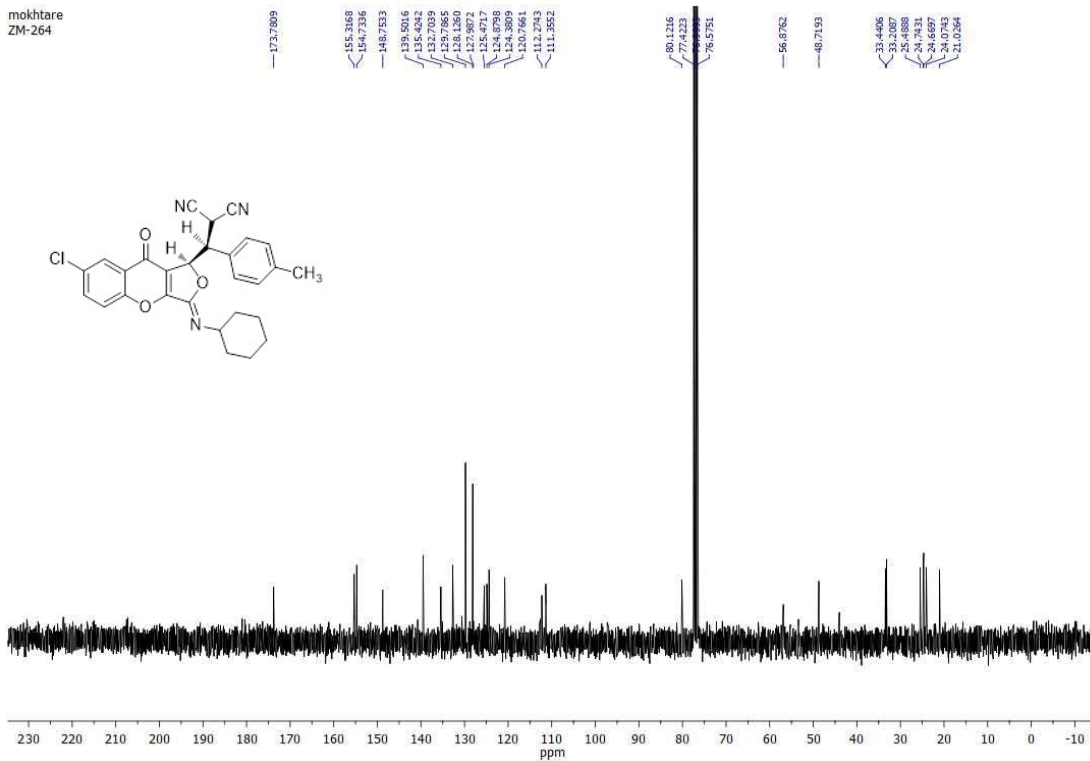

**FT-IR of 4m:**

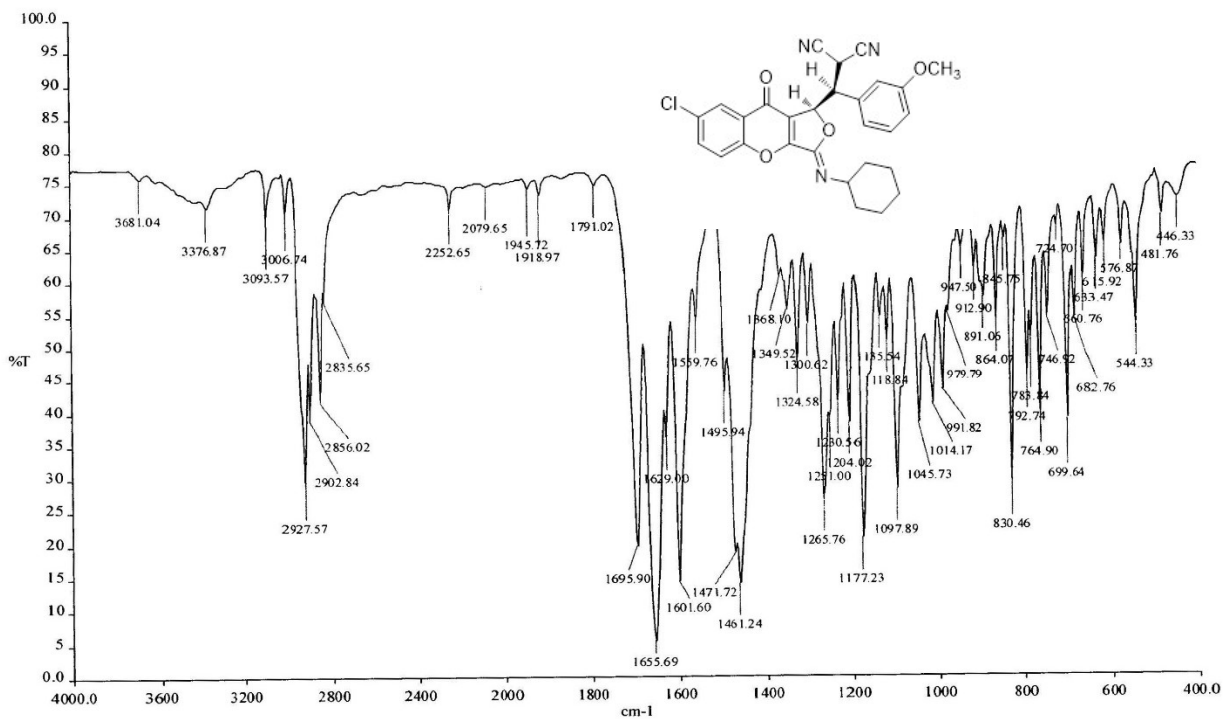

Ms. Mokhtare

Sample: ZM-284

**<sup>1</sup>H NMR (300 MHz, CDCl<sub>3</sub>) of 4m:**

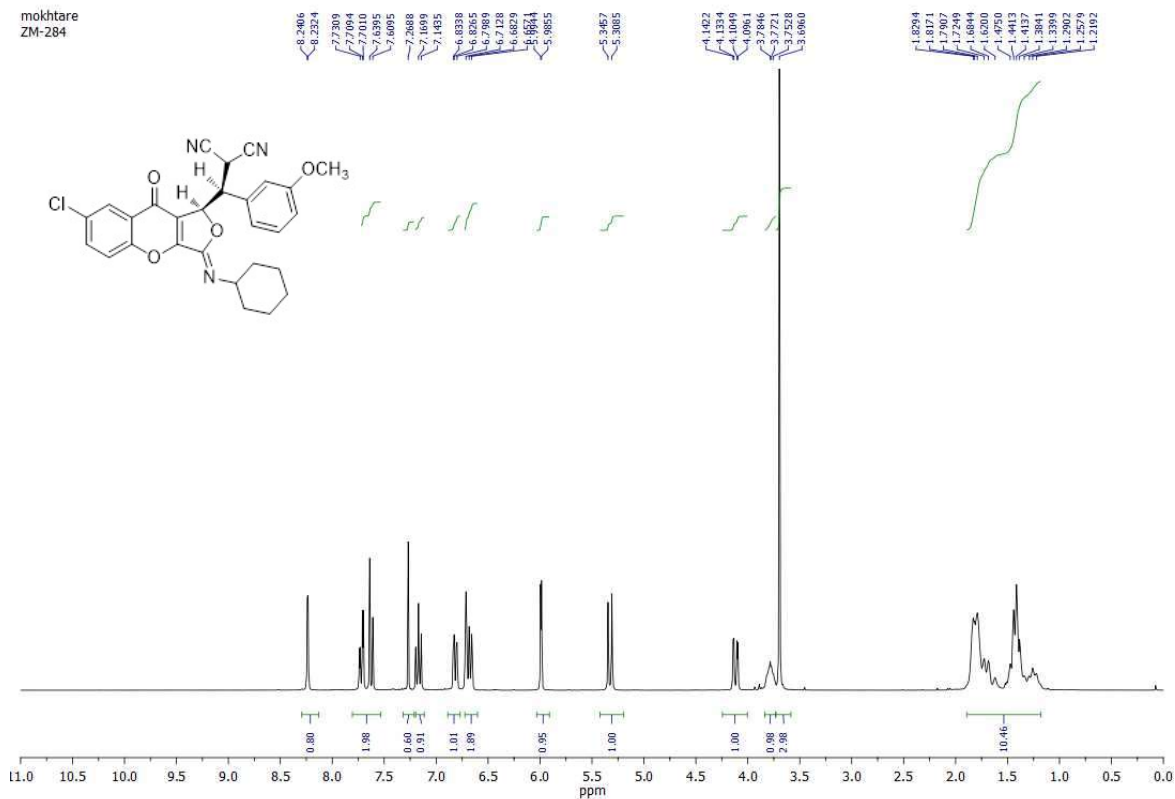



### <sup>13</sup>C NMR (75 MHz, CDCl<sub>3</sub>) of 4m:

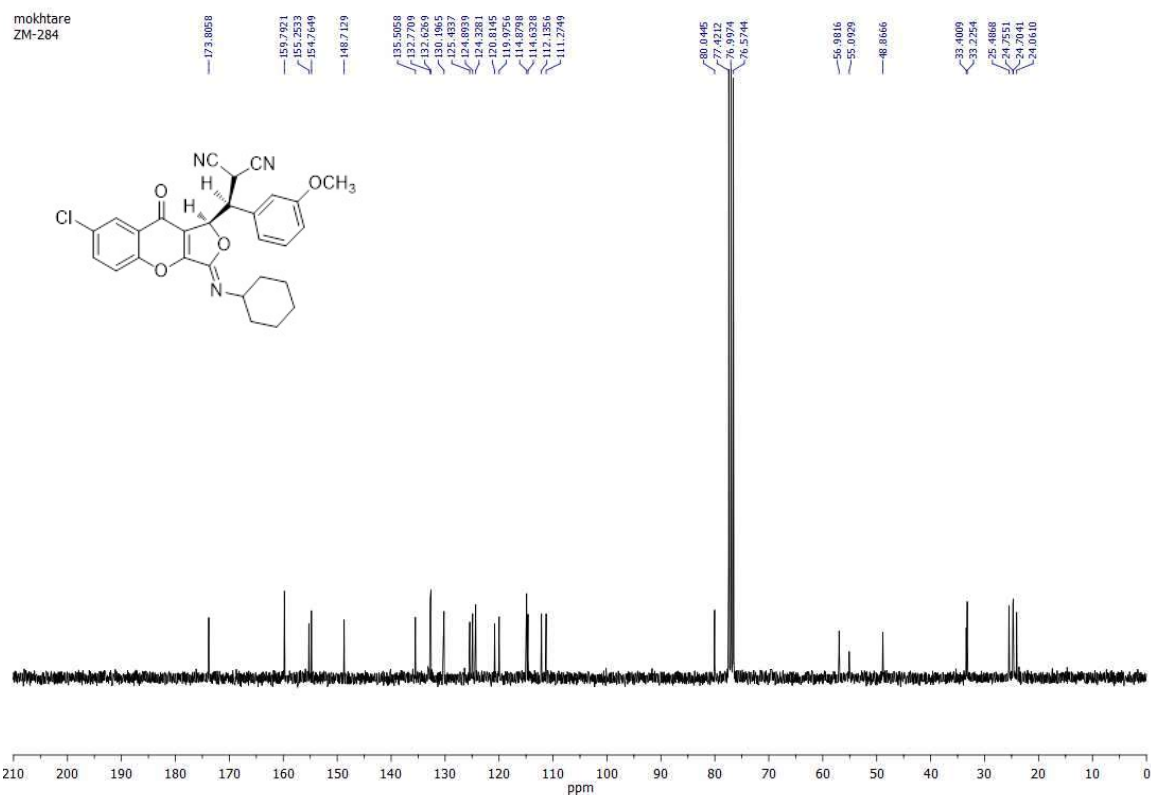

### FT-IR of 4n:

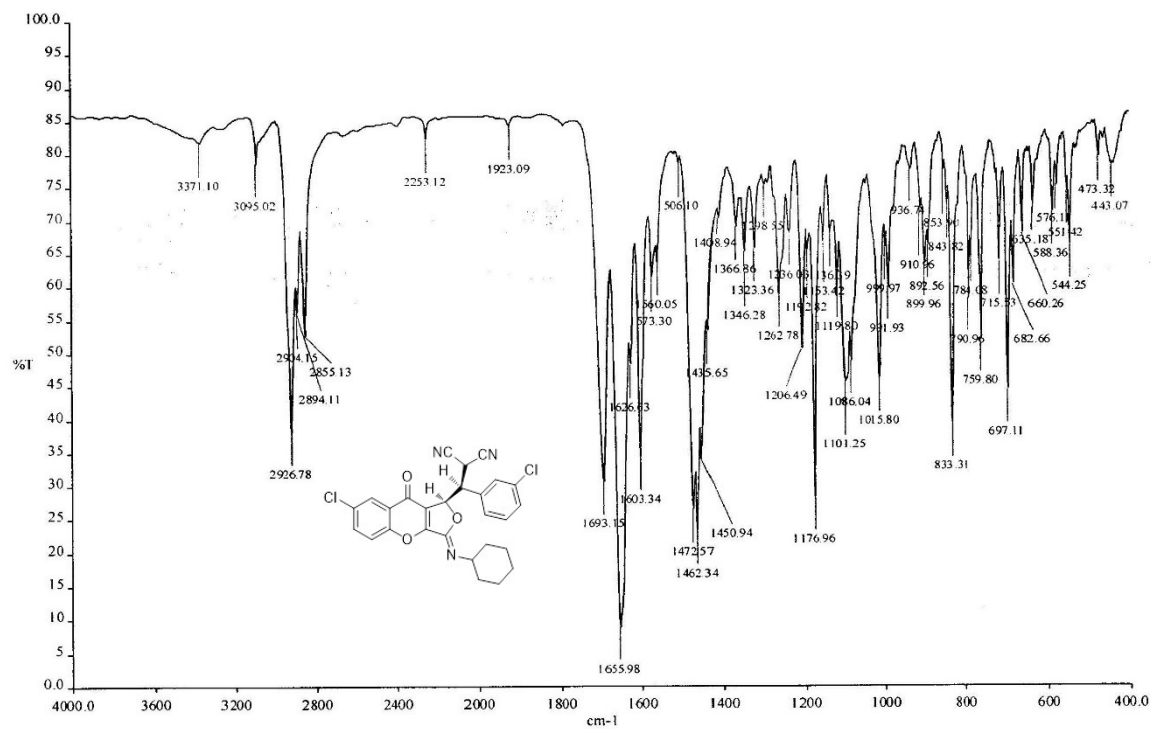

Ms. Mokhtare

Sample: ZM-182

### <sup>1</sup>H NMR (300 MHz, CDCl<sub>3</sub>) of 4n:

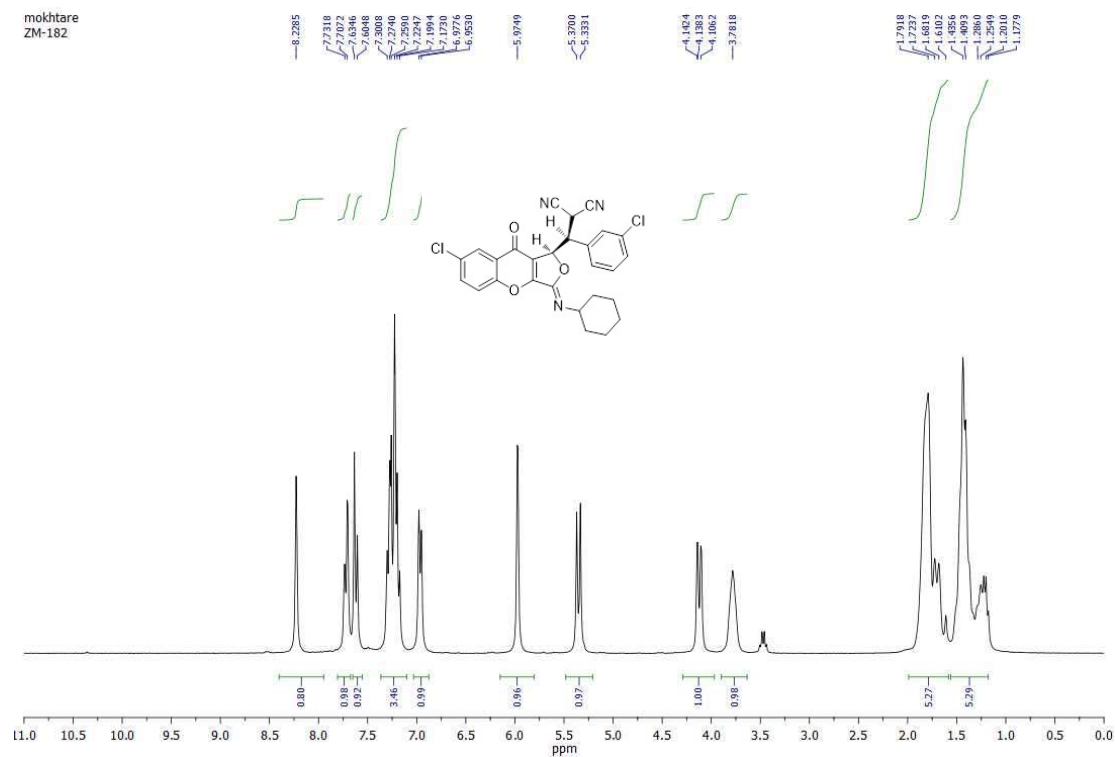

### <sup>13</sup>C NMR (75 MHz, CDCl<sub>3</sub>) of 4n:

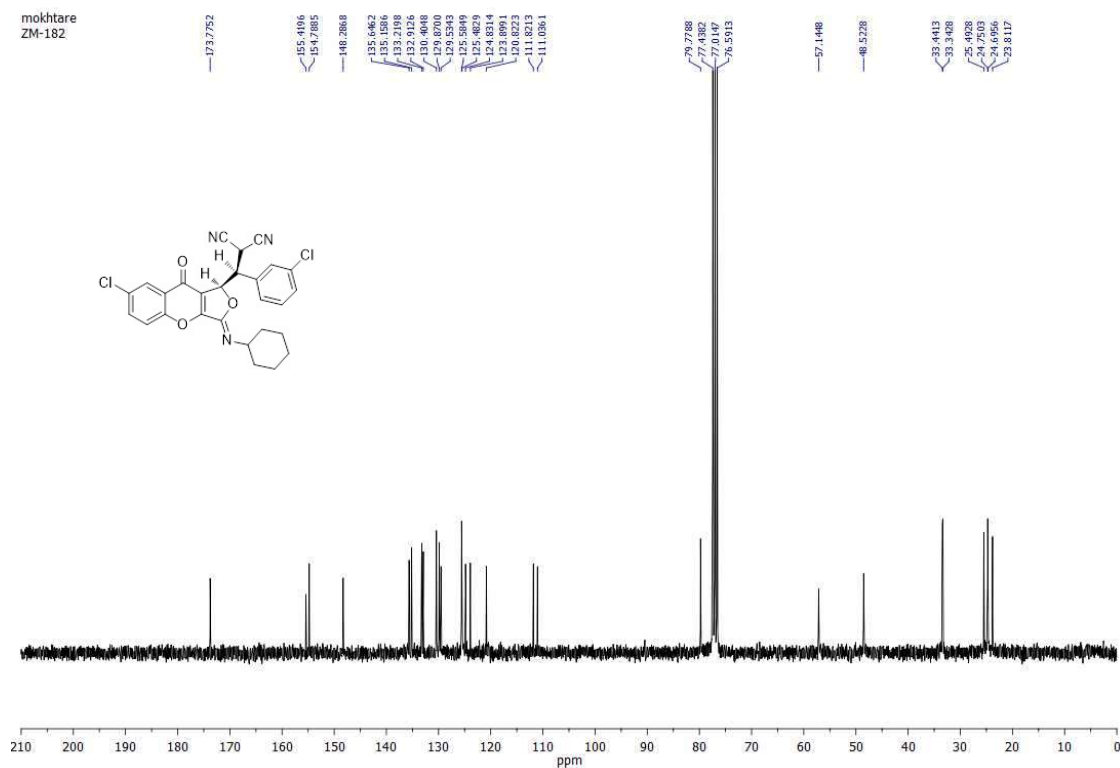

# HRMS of 4n:

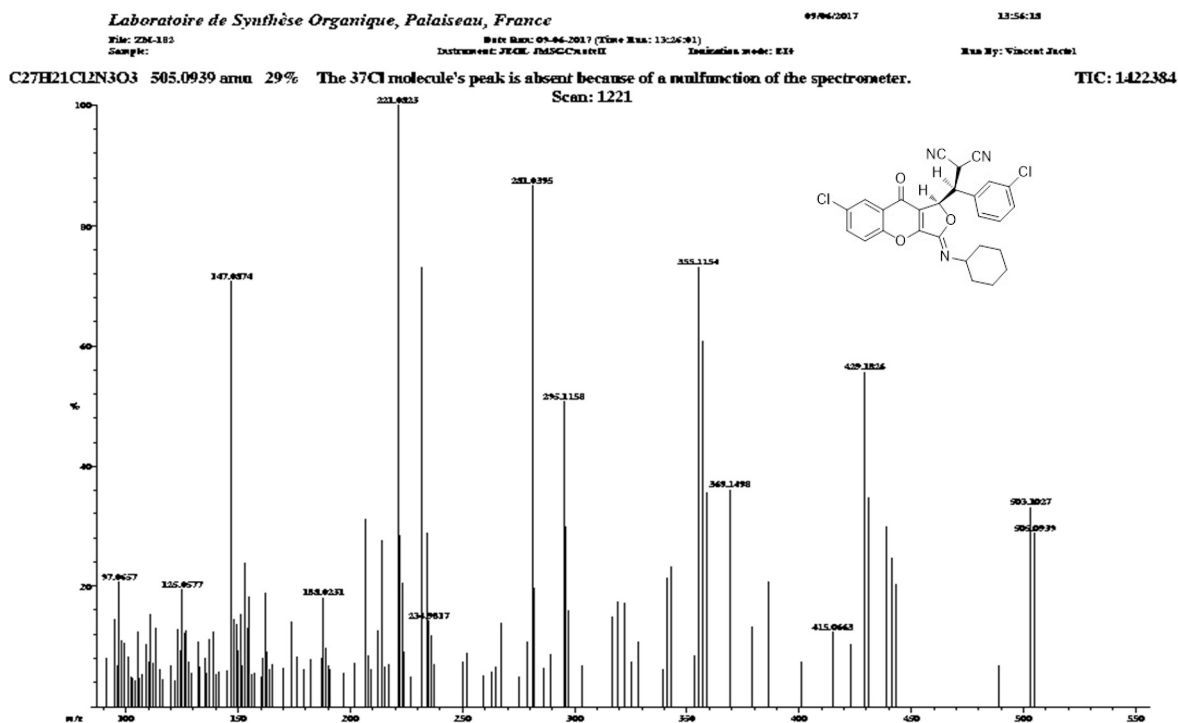

# FT-IR of 4o:

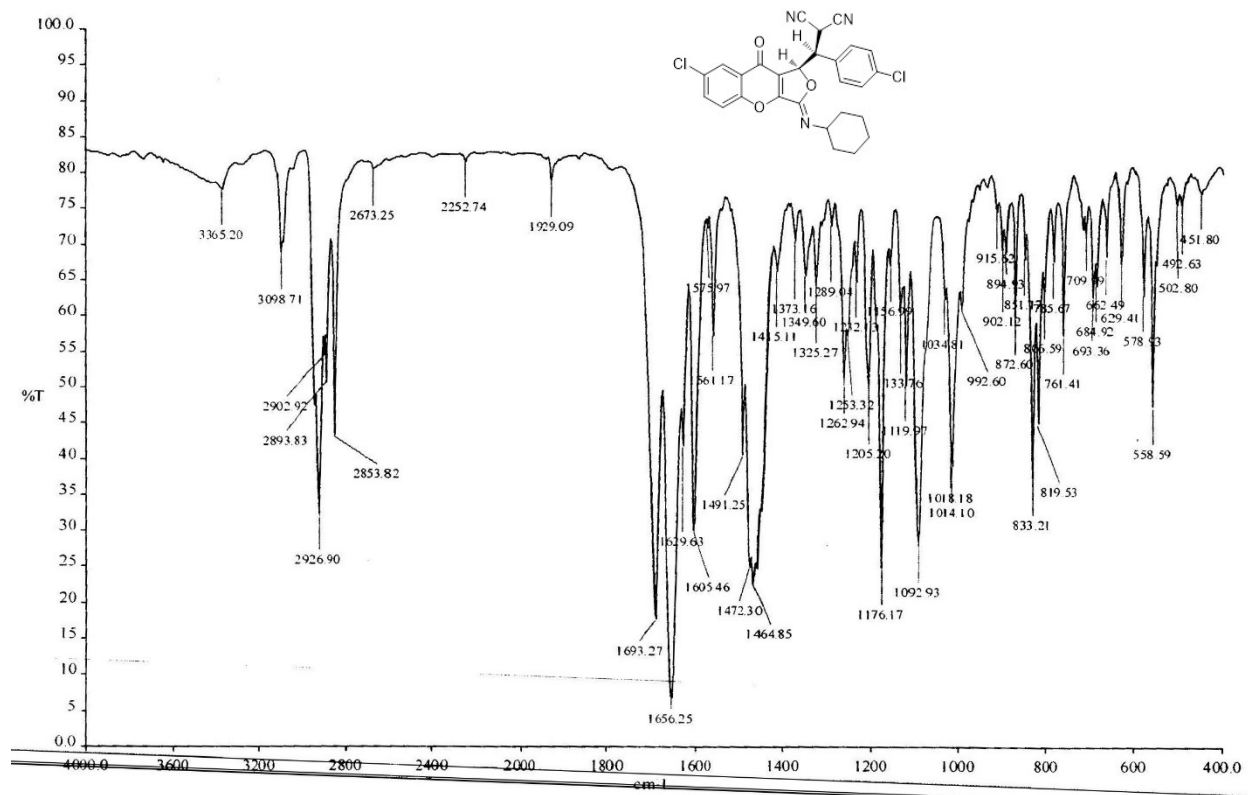

Ms. Mokhtar

Sample: ZM-94

**<sup>1</sup>H NMR (300 MHz, CDCl<sub>3</sub>) of 4o:**

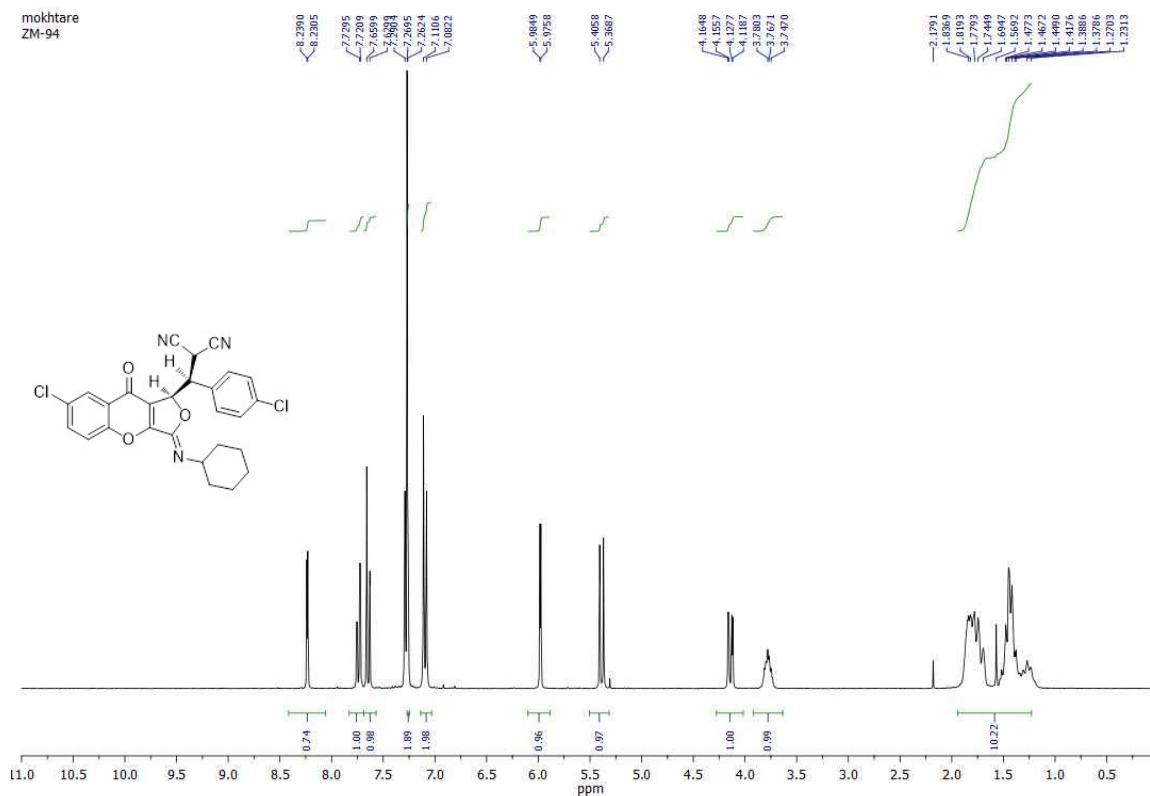

**<sup>13</sup>C NMR (75 MHz, CDCl<sub>3</sub>) of 4o:**

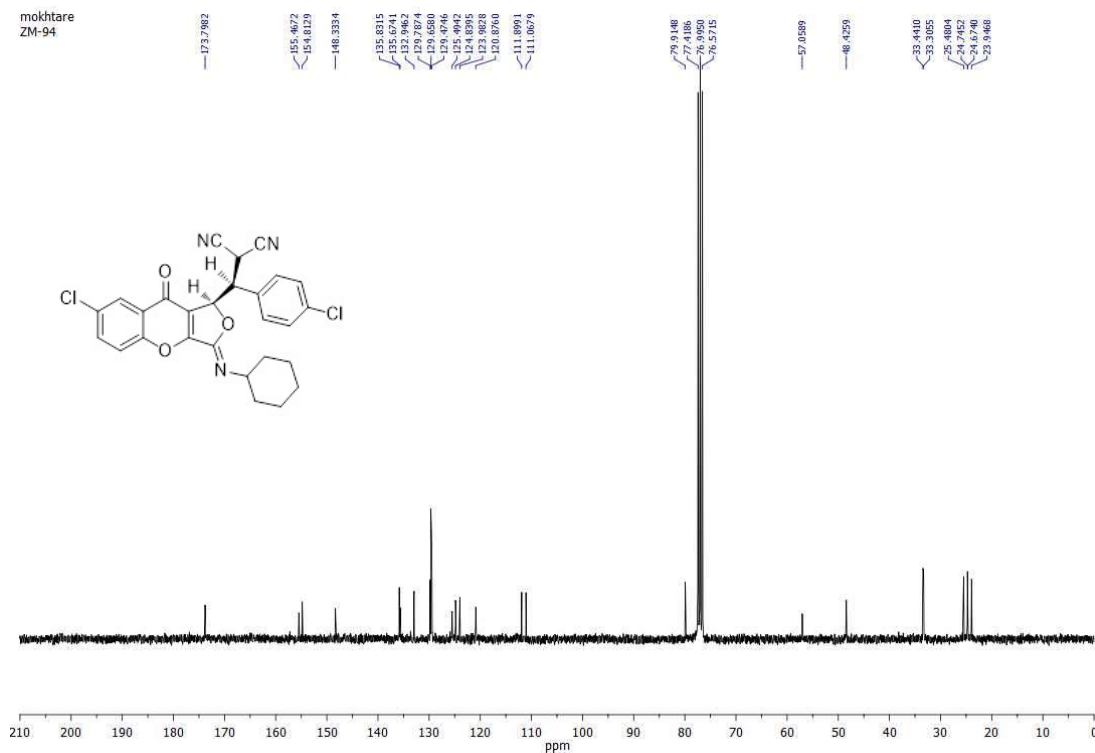

# HRMS of 4o:

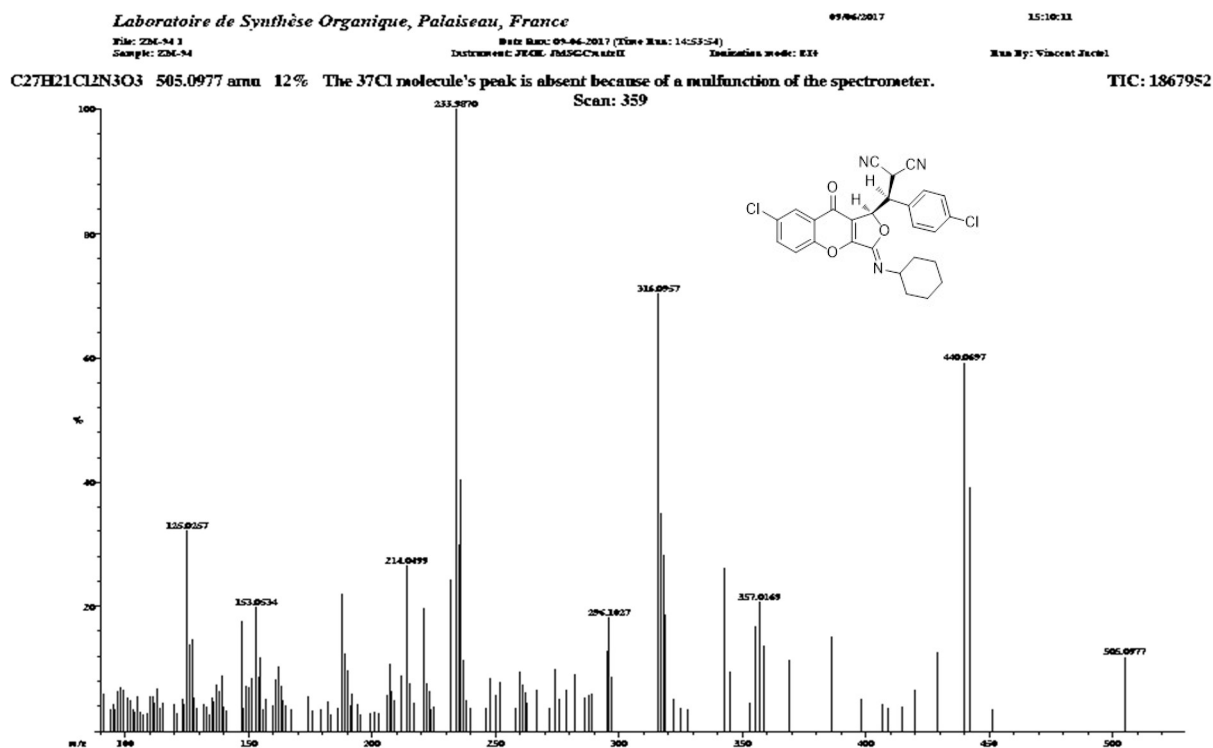

# FT-IR of 4p:

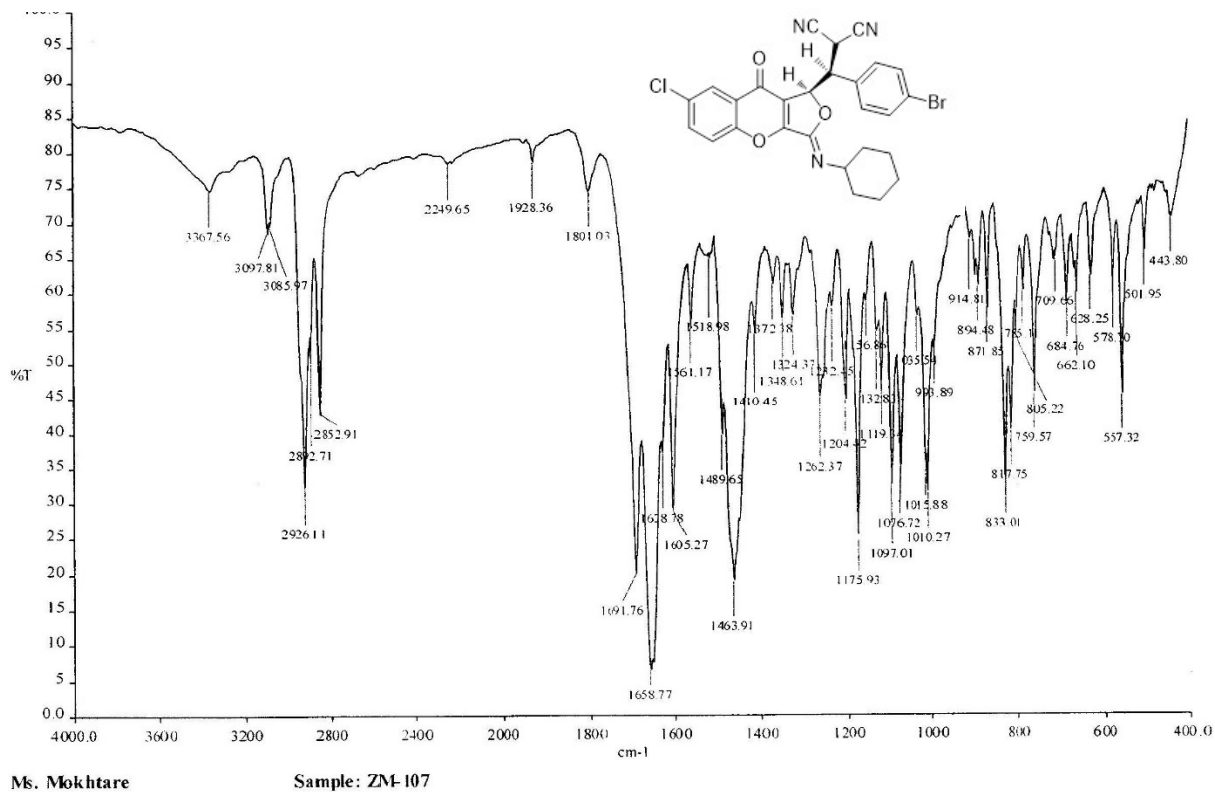

# <sup>1</sup>H NMR (300 MHz, CDCl<sub>3</sub>) of 4p:

mokhtare  
ZM-107

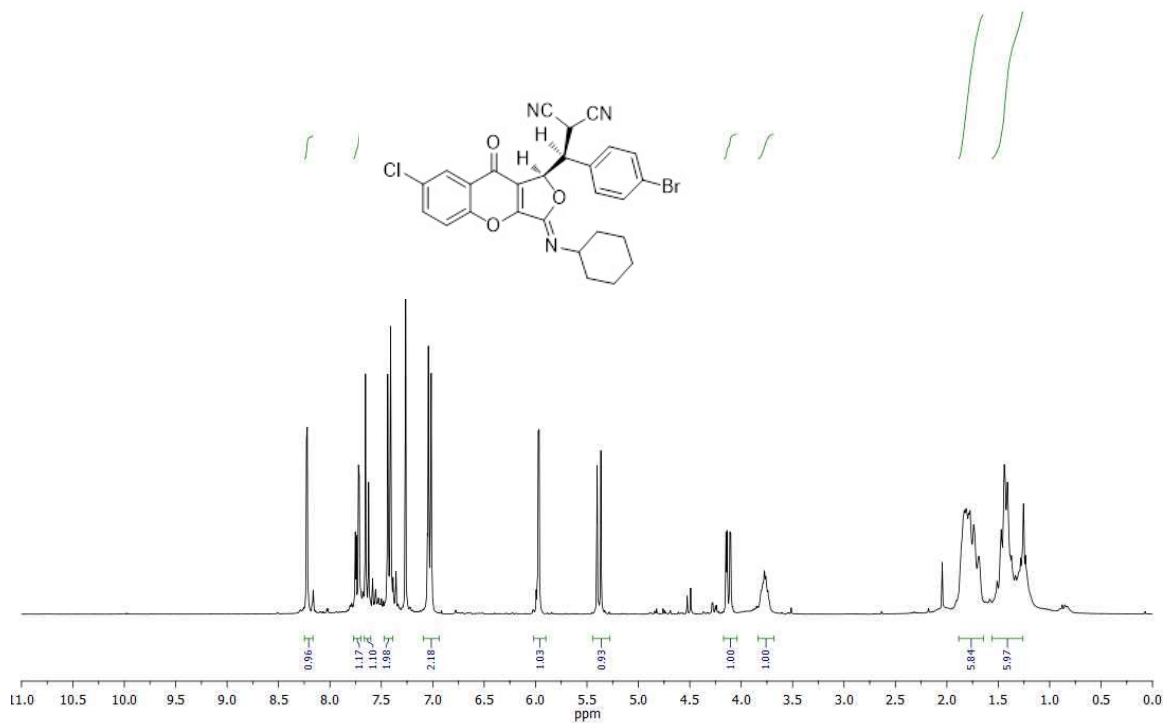

# <sup>13</sup>C NMR (75 MHz, CDCl<sub>3</sub>) of 4p:

mokhtare  
ZM-107

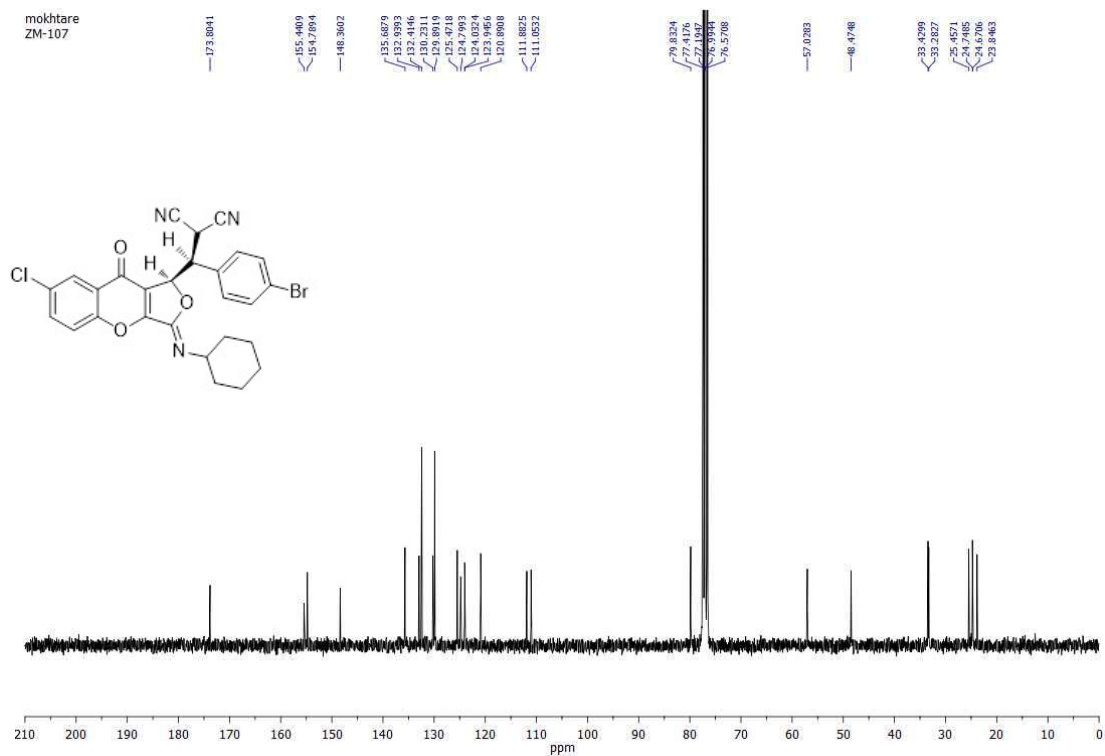

**FT-IR of 4q:**

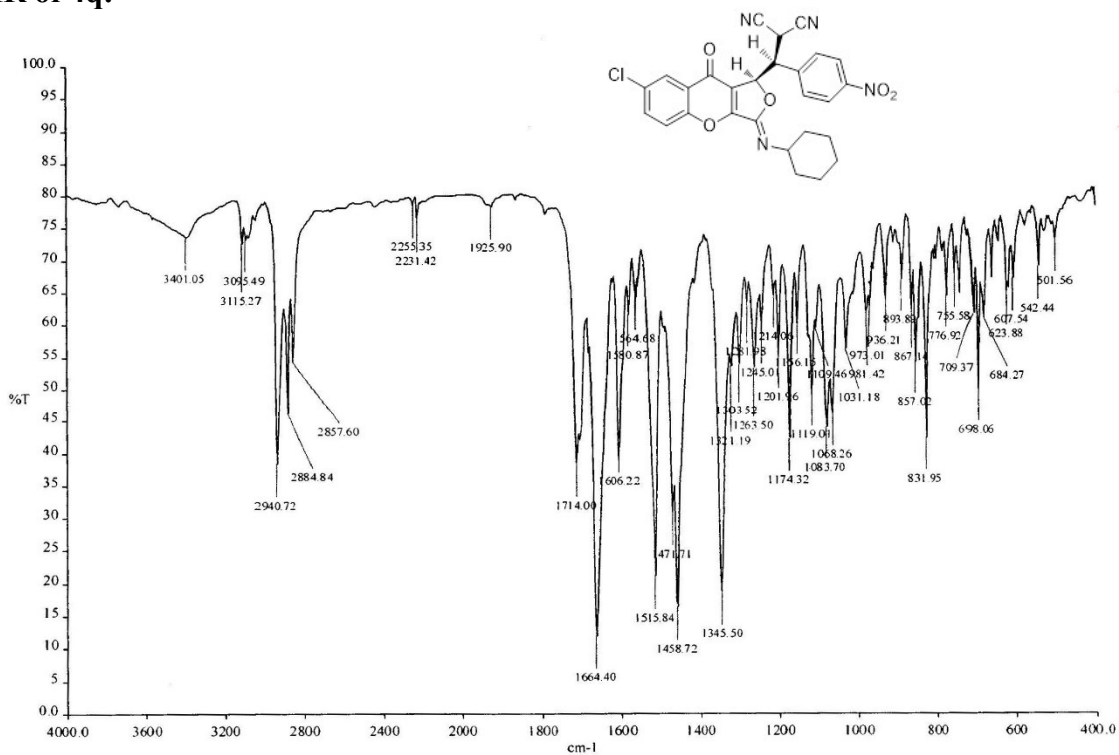

Ms. Mokhtare

Sample: ZM-71

**<sup>1</sup>H NMR (300 MHz, CDCl<sub>3</sub>) of 4q:**

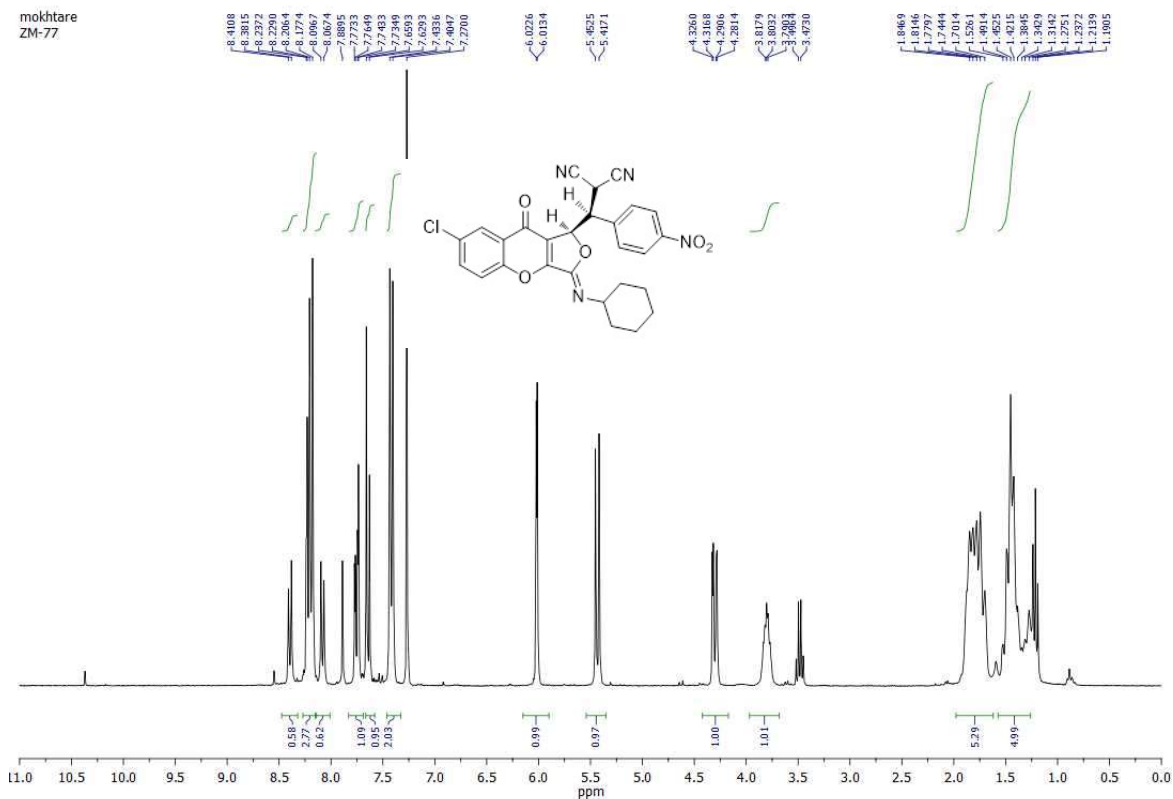

### <sup>13</sup>C NMR (75 MHz, CDCl<sub>3</sub>) of 4q:

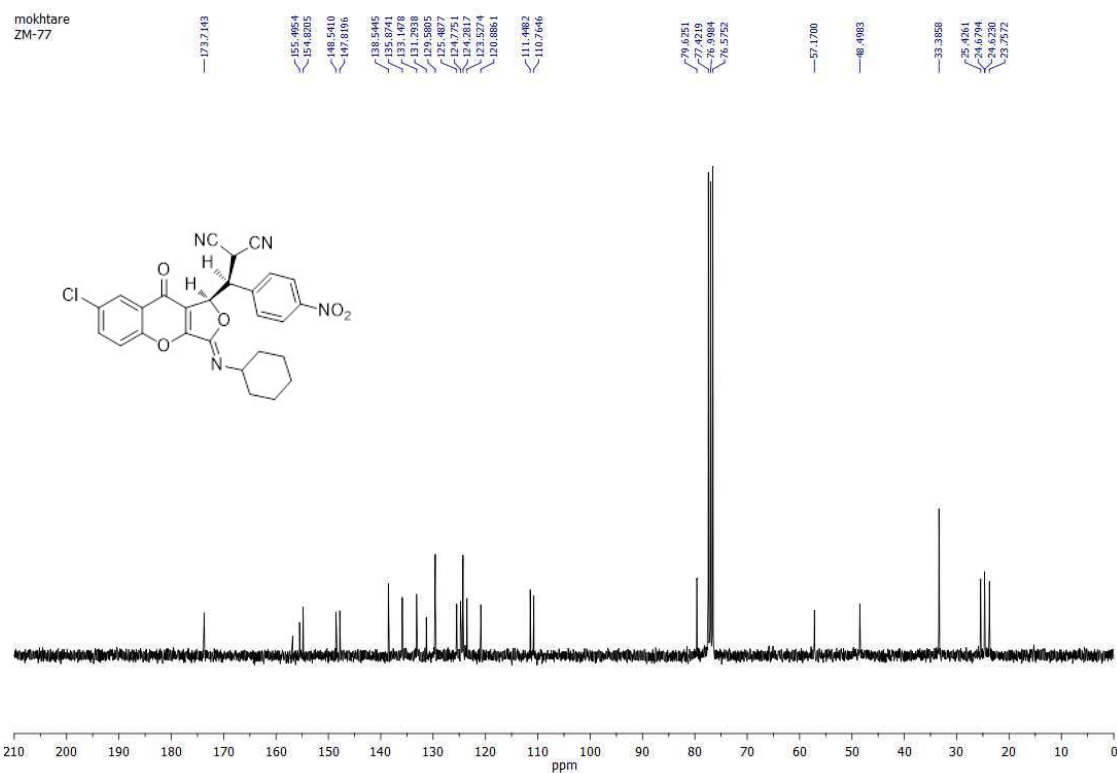

### FT-IR of 4r:

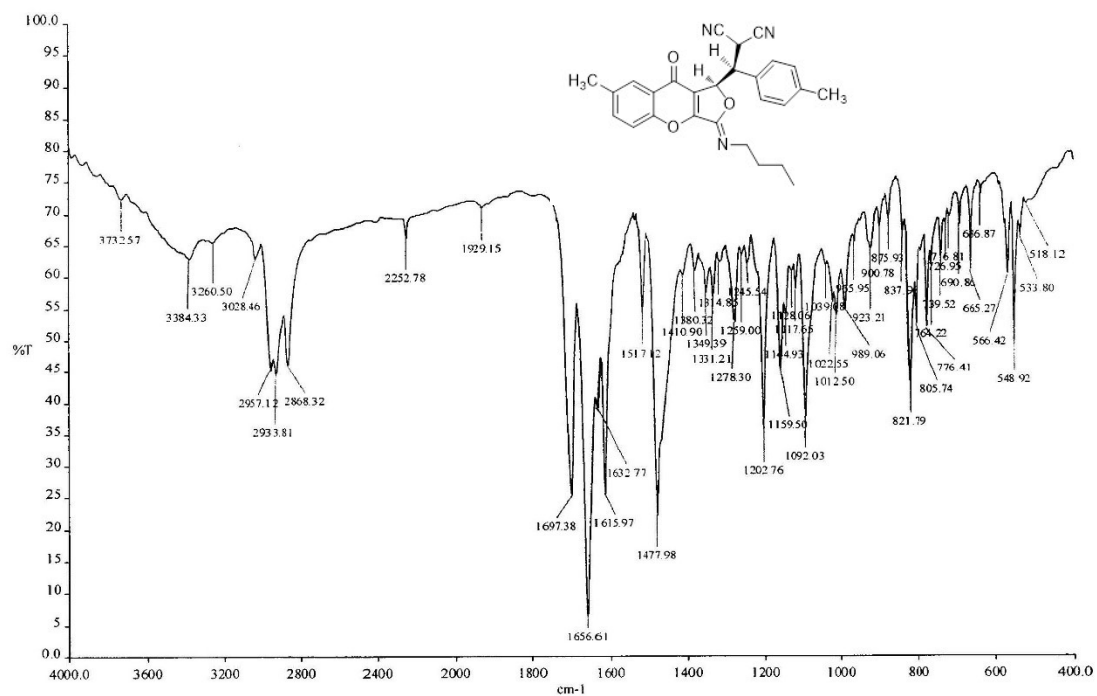

Ms. Mokhtare

Sample: ZM-265



**<sup>1</sup>H NMR (300 MHz, CDCl<sub>3</sub>) of 4r:**

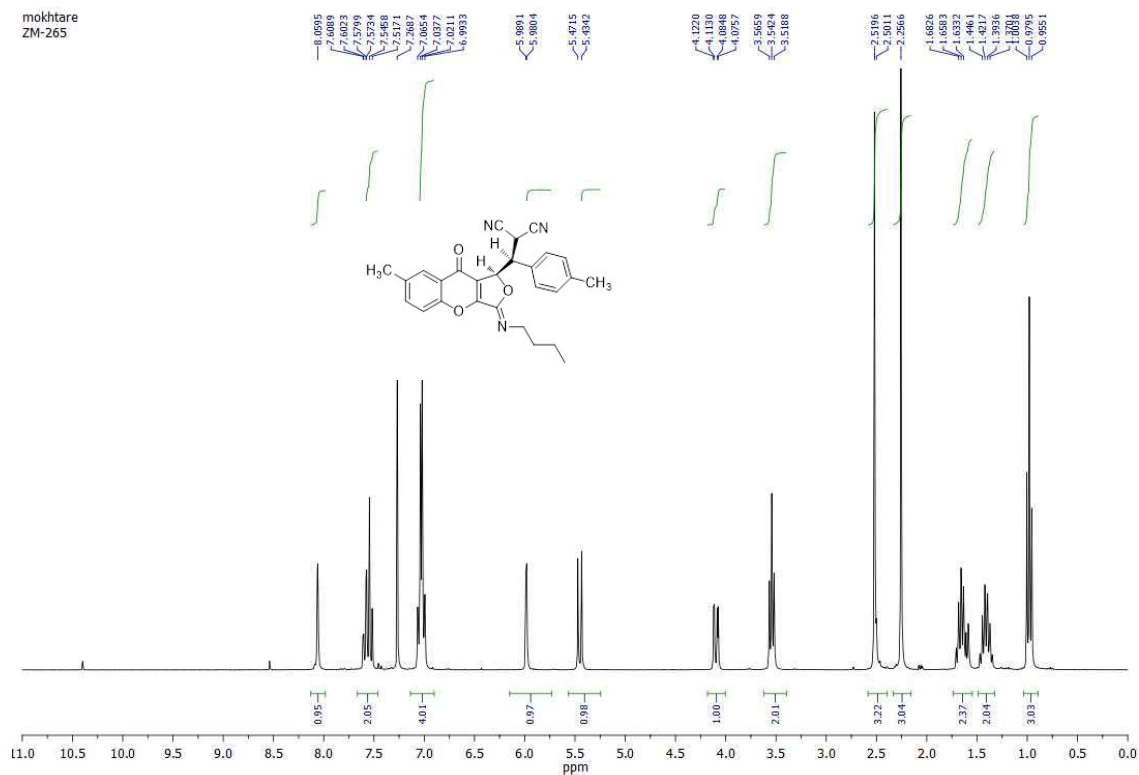

**<sup>13</sup>C NMR (75 MHz, CDCl<sub>3</sub>) of 4r:**

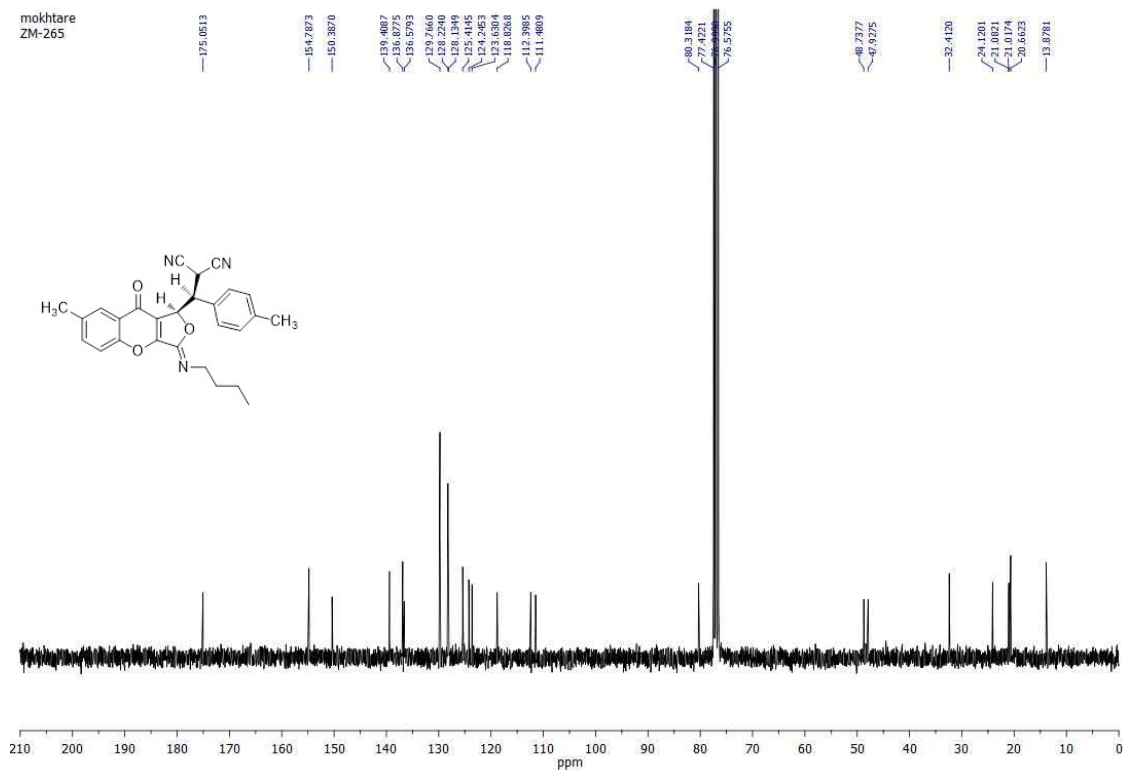

### Single crystal structure of **4p**:

The yellow plate shape crystals of compound **4p** were obtained from methanol after 4 days. In order to have strong document about the molecular structure of product, the crystals of compound **4p** were also studied by single crystal X-ray diffraction studies. A suitable single crystal of **4p** was selected and mounted on a glass fiber. The X-ray diffraction data collection was done on a STOE IPDS-II diffractometer with graphite-monochromated Mo-K $\alpha$  radiation at room temperature. Diffraction data were collected in a series of  $\omega$  scans in 1° oscillations and integrated using the Stoe X-Area [1] software package. A numerical absorption correction was applied using X-RED [2] and X-SHAPE [3] software. The data were corrected for Lorentz and polarizing effects. The structures were solved by direct methods [4] and subsequent difference Fourier maps and then refined on  $F^2$  by a full-matrix least-squares procedure using anisotropic displacement parameters [5]. All refinements were performed using the X-STEP32 crystallographic software package [6]. The data collection and refinement processes are summarized in Table 1.

**Table 1.** Crystal data and structure refinement parameters for compound **4p**.

| Compound                                  | <b>4p</b>                                                         |
|-------------------------------------------|-------------------------------------------------------------------|
| Net formula                               | <u>C<sub>27</sub>H<sub>21</sub>BrClN<sub>3</sub>O<sub>3</sub></u> |
| <i>M<sub>w</sub></i> /g mol <sup>-1</sup> | 550.82                                                            |
| Crystal size/mm                           | <u>0.45</u> × <u>0.15</u> × <u>0.05</u>                           |
| <i>T</i> /K                               | 298                                                               |
| Radiation                                 | Mo K $\alpha$                                                     |
| Diffractometer                            | STOE IPDS 2T                                                      |
| Crystal system                            | Triclinic                                                         |
| Crystal shape, color                      | Plate, yellow                                                     |
| space group                               | <i>P</i> -1                                                       |
| <i>a</i> /Å                               | 8.8254(15)                                                        |
| <i>b</i> /Å                               | 9.1172(14)                                                        |
| <i>c</i> /Å                               | 16.392(2)                                                         |
| $\alpha$ /°                               | 94.438(12)                                                        |
| $\beta$ /°                                | 90.270(13)                                                        |
| $\gamma$ /°                               | 111.705(13)                                                       |
| <i>V</i> /Å <sup>3</sup>                  | 1221.0(3)                                                         |
| <i>Z</i>                                  | 2                                                                 |
| calc. density/g cm <sup>-3</sup>          | 1.498                                                             |
| $\mu$ /mm <sup>-1</sup>                   | 1.83                                                              |
| <i>F</i> (000)                            | 560                                                               |
| $\theta$ range/°                          | 2.4–27.0                                                          |
| <i>h</i>                                  | –11→11                                                            |
| <i>k</i>                                  | –11→10                                                            |

|                                                                                    |                |
|------------------------------------------------------------------------------------|----------------|
| $l$                                                                                | -20→20         |
| $R_{\text{int}}$                                                                   | 0.151          |
| $R[F^2 > 2\sigma(F^2)]$                                                            | 0.069          |
| $wR(F^2)$                                                                          | 0.165          |
| $S$                                                                                | 0.82           |
| Measured reflections                                                               | 11405          |
| Independent reflections                                                            | 5326           |
| Reflections with $I > 2\sigma(I)$                                                  | 2009           |
| Parameters                                                                         | 316            |
| $\Delta\rho_{\text{min}}$ and $\Delta\rho_{\text{max}}/ \text{e } \text{\AA}^{-3}$ | -0.51 and 0.70 |

---

The structural data have been deposited at the Cambridge Crystallographic Data Center (CCDC No 2049904). These data can be obtained free of charge from The Cambridge Crystallographic Data Center via [www.ccdc.cam.ac.uk/structures](http://www.ccdc.cam.ac.uk/structures).

### Description of the crystal structure **4p**:

The plate yellow crystals of compound **4p** were studied by single crystal X-ray diffraction analysis. Structural studies indicated this compound is crystallized in triclinic crystal system. The molecular structure of compound **4p** is shown in Fig. 1 and the selected bond lengths and angles are collected in Table 2. As it is shown in Fig. 1, the structure of compound **4p** the desired compound is successfully synthesized. (Please write some details about the spectroscopic properties of the compound and their agreement with the crystal structure). The N3-C22 and N3-C21 bond lengths are 1.487(6) and 1.246(6) Å which are in agreement with double and single carbon-nitrogen bond lengths, respectively. The C9-N1 (1.109(7) Å) and C10-N2 (1.108(7) Å) bonds are considerably shorter than these bonds which confirm the presence of C≡N bond in malononitrile unit.

The crystal structure of compound **4p** is stabilized by several CHO and CHN intermolecular hydrogen bond interactions (see Fig. 2a). The oxygen atoms of ketone functionality and chromene ring involve with C-H...O interactions with the hydrogen atoms of the neighboring molecules (see green dashed lines in Fig. 2a). The nitrogen atoms of the malononitrile functionality also form intermolecular C-H...N hydrogen bond interactions with the phenyl rings (see pink dashed lines in Fig. 2a and Fig. 3). The strong C-H... $\pi$  and  $\pi$ ... $\pi$  interactions between the aromatic and heterocyclic rings of the compound further stabilize the crystal packing of compound **1** (see Fig. 2b).

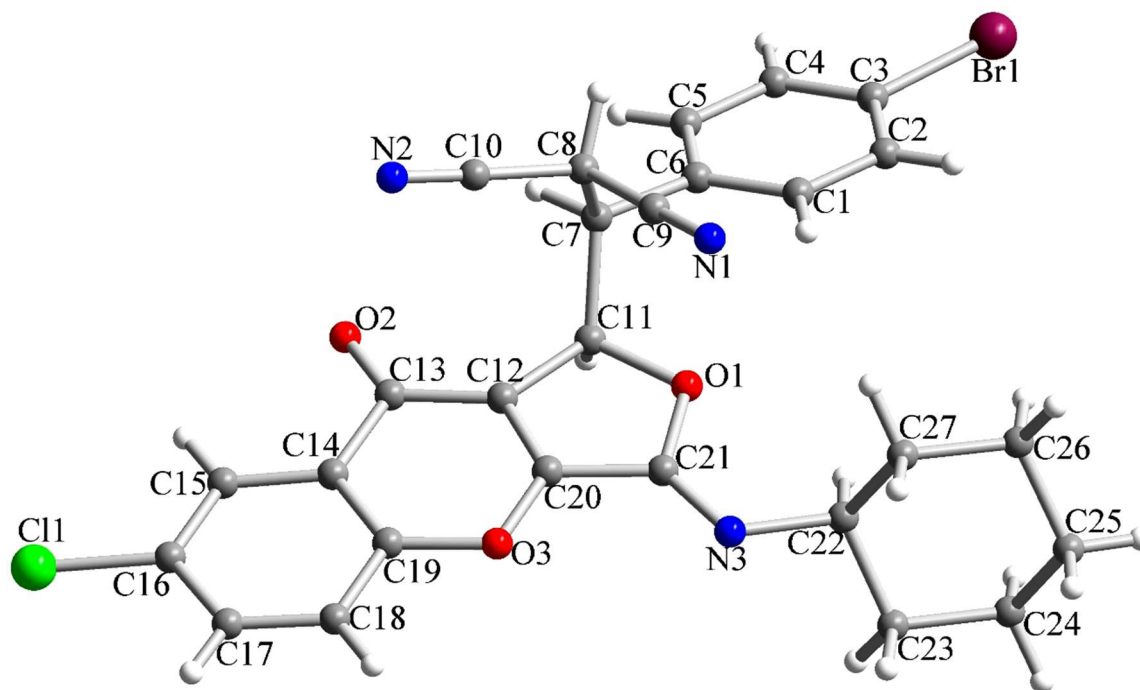

**Fig. 2.** Molecular structure of compound **4p** with atom labeling scheme.

**Table 2.** Selected bond lengths and angles in the crystal structure of compound **4p**.

| <b>Bond</b> | <b>Length/Å</b> | <b>Bond</b> | <b>Angle/°</b> |
|-------------|-----------------|-------------|----------------|
| C3–Br1      | 1.893(5)        | C6–C7–C8    | 113.0(4)       |
| C16–Cl1     | 1.717(5)        | C6–C7–C11   | 109.8(4)       |
| C9–N1       | 1.109(7)        | C8–C7–C11   | 116.0(4)       |
| C10–N2      | 1.108(7)        | C21–N3–C22  | 117.8(4)       |
| C22–N3      | 1.487(6)        | C21–O1–C11  | 110.5(4)       |
| C21–N3      | 1.246(6)        | C20–O3–C19  | 115.8(4)       |
| C11–O1      | 1.453(6)        | N1–C9–C8    | 178.4(8)       |
| C13–O2      | 1.227(6)        | N2–C10–C8   | 178.7(7)       |
| C19–O3      | 1.374(6)        | N3–C21–O1   | 124.4(5)       |
| C20–O3      | 1.336(5)        | N3–C21–C20  | 129.7(5)       |
| C21–O1      | 1.392(6)        | N3–C22–C23  | 109.2(4)       |
| C6–C7       | 1.529(7)        | O1–C11–C12  | 104.1(4)       |
| C7–C8       | 1.536(7)        | O1–C11–C7   | 109.5(4)       |
| C7–C11      | 1.548(7)        | O1–C21–C20  | 105.9(4)       |
| C8–C9       | 1.466(8)        | O2–C13–C12  | 125.0(5)       |
| C8–C10      | 1.470(8)        | O2–C13–C14  | 122.9(5)       |
| C11–C12     | 1.505(6)        | O3–C20–C12  | 126.6(4)       |
|             |                 | O3–C20–C21  | 121.7(4)       |
|             |                 | O3–C19–C14  | 122.7(4)       |
|             |                 | O3–C19–C18  | 115.9(5)       |

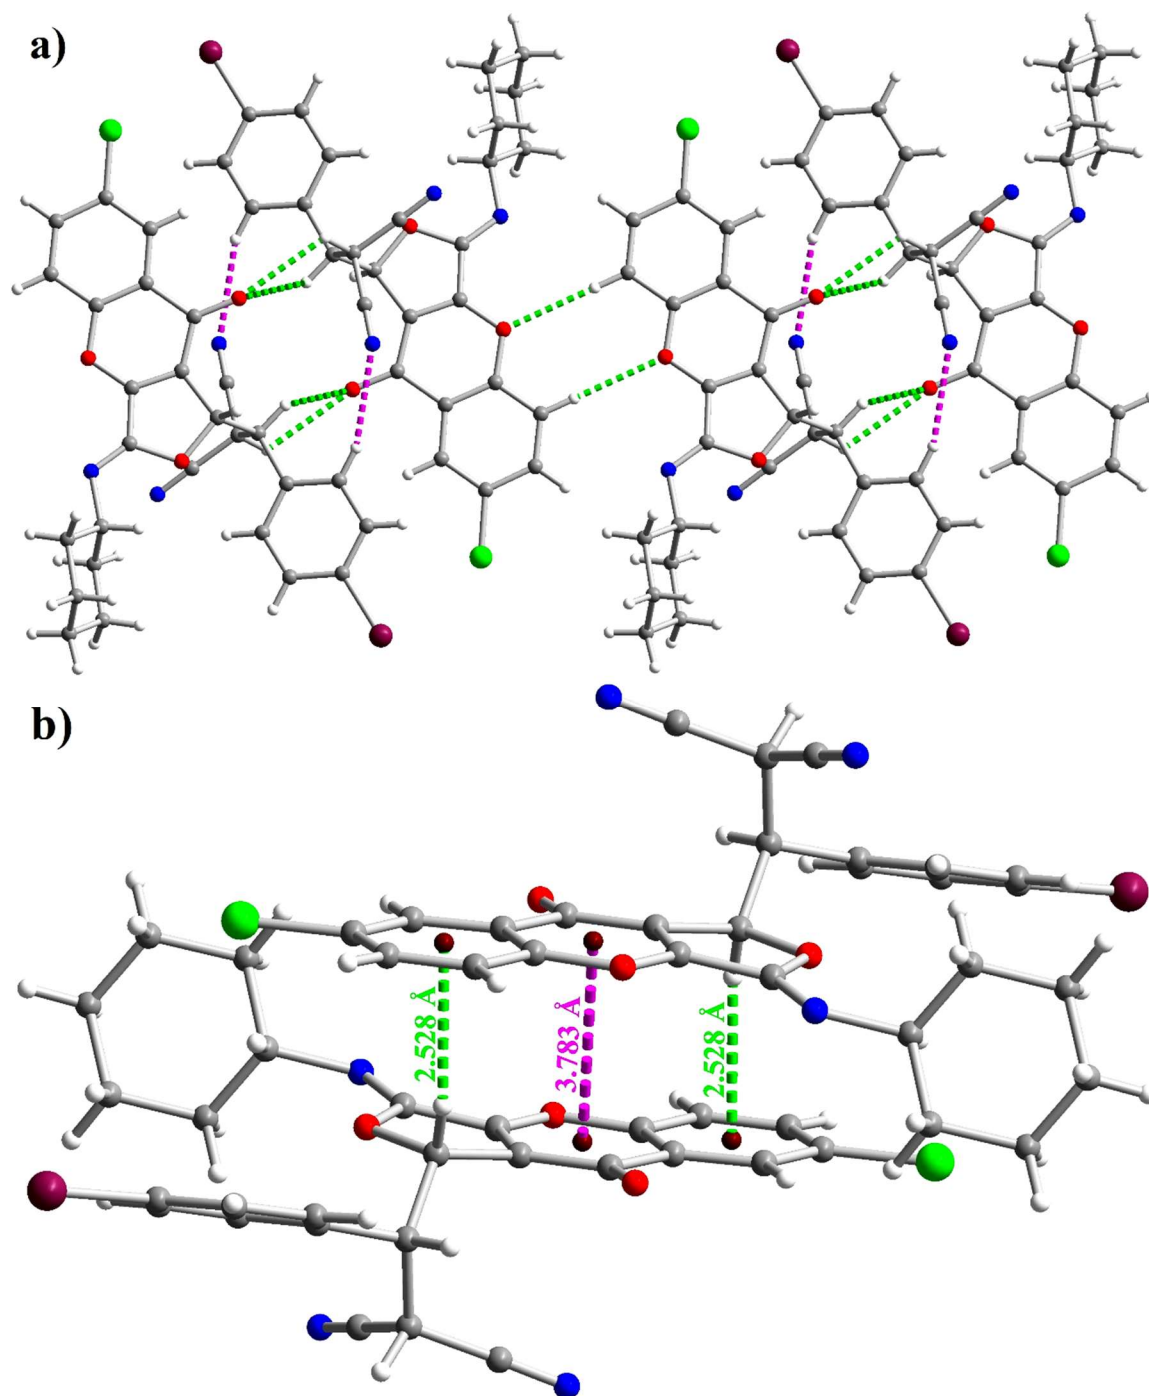

**Fig. 2.** a) Intermolecular C-H...O (green dashed lines) and C-H...N (pink dashed lines) interactions; b) C-H... $\pi$  (green dashed lines) and  $\pi$ ... $\pi$  (pink dashed lines) interactions in the crystal structure of **4p**.

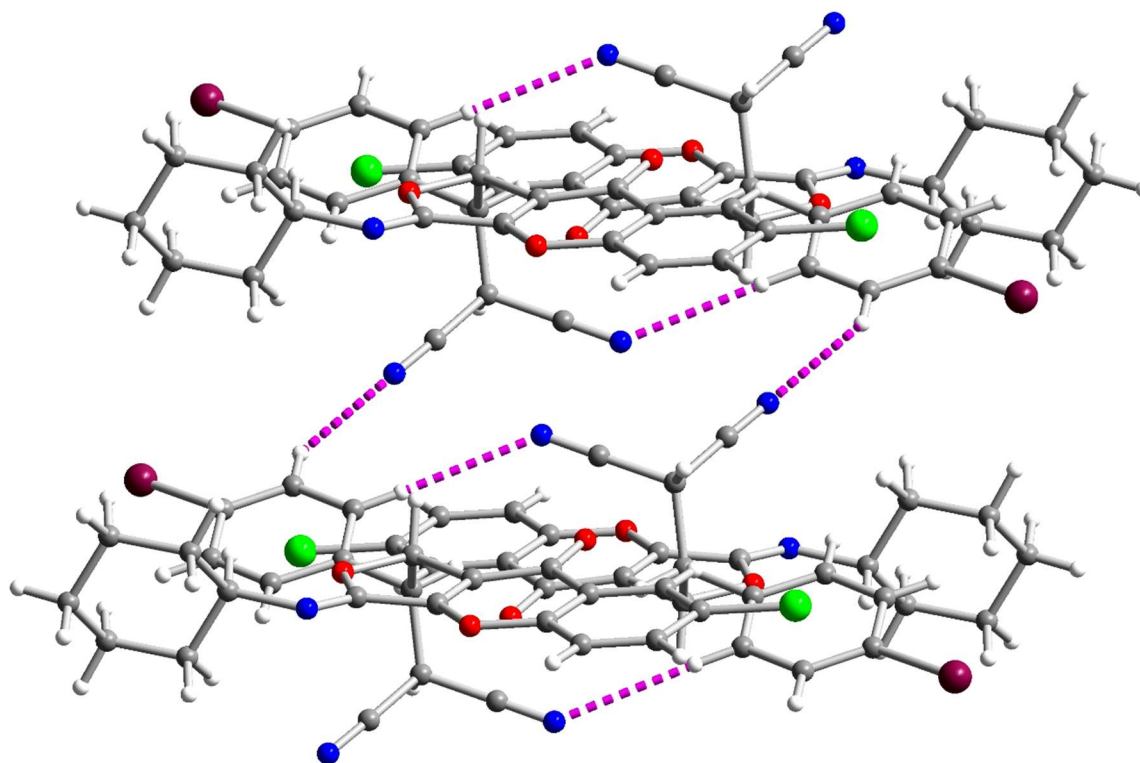

**Fig. 3.** Intermolecular C–H···N interactions in the crystal structure of **4p** shown as pink dashed lines.

### References:

- [1] *X-AREA: Program for the Acquisition and Analysis of Data, version 1.30, Darmstadt, Germany, 2005.*
- [2] *X-RED: Program for Data Reduction and Absorption Correction, version 1.28b, Darmstadt, Germany, 2005.*
- [3] *X-SHAPE: Program for Crystal Optimization for Numerical Absorption Correction, version 2.05, Darmstadt, Germany, 2004.*
- [4] Sheldrick, G. M. *SHELX97; Program for Crystal Structure Solution, University of Göttingen: Göttingen, Germany, 1997.*
- [5] Sheldrick, G. M. *SHELX97; Program for Crystal Structure Refinement, University of Göttingen: Göttingen, Germany, 1997.*
- [6] *X-STEP32: Crystallographic Package, version 1.07b, Darmstadt, Germany, 2000.*
